# Supplementary material for: Programmable synthesis of multiply arylated cubanes through C–H metalation and arylation
Source: Chem Sci. 2020 Apr 24;11(29):7672–5. doi: 10.1039/d0sc01909g (PMC8159448; doi:10.1039/d0sc01909g)
Supplement: SC-011-D0SC01909G-s001 [file SC-011-D0SC01909G-s001.pdf]

## Supporting Information

---

### **Programmable Synthesis of Multiply Arylated Cubanes through C–H Metalation and Arylation**

Ryo Okude,<sup>†</sup> Genki Mori,<sup>‡</sup> Akiko Yagi,<sup>†,\*</sup> and Kenichiro Itami<sup>†,#,¶,\*</sup>

<sup>†</sup> Graduate School of Science, Nagoya University, Chikusa, Nagoya 464-8602, Japan.

<sup>‡</sup> Central Pharmaceutical Research Institute, Japan Tobacco Inc., 1-1 Murasaki-cho, Takatsuki,  
Osaka 569-1125, Japan.

<sup>#</sup> JST-ERATO, Itami Molecular Nanocarbon Project, Nagoya University, Chikusa, Nagoya  
464-8602, Japan.

<sup>¶</sup> Institute of Transformative Bio-Molecules (WPI-ITbM), Nagoya University, Chikusa,  
Nagoya 464-8602, Japan.

---

#### **Table of Contents**

|                                                                     |        |
|---------------------------------------------------------------------|--------|
| 1. General                                                          | S2     |
| 2. Ligand Screening                                                 | S3     |
| 3. Synthesis of Starting Materials                                  | S4     |
| 4. Preparation of the Reagent TMPZn <sup>t</sup> Bu <sub>2</sub> Li | S4-5   |
| 5. General Procedure for Pd-catalyzed Arylation of Cubane           | S5-13  |
| 6. Synthesis of Multiply Arylated Cubanes                           | S13–24 |
| 7. X-ray Crystallographic Analysis                                  | S25–31 |
| 8. HPLC Chart                                                       | S32–33 |
| 9. Reference                                                        | S34    |
| 10. <sup>1</sup> H and <sup>13</sup> C NMR Spectra                  | 35–96  |

## 1. General

Unless otherwise noted, all reactants or reagents including dry solvents were obtained from commercial suppliers and used without further purification except for  $\text{ZnCl}_2$  (vacuum drying using heat gun).  $\text{Pd}_2(\text{dba})_3 \cdot \text{CHCl}_3$ , tris(4-(trifluoromethyl)phenyl)phosphite, *N,N*-diethyl-4-iodobenzenesulfonamide, *N,N*-diethyl-4-iodobenzenamide and 2-iodonaphthalene were prepared according to the procedures reported in the literatures.<sup>[S1-5]</sup> All reactions were performed with dry solvents under an atmosphere of  $\text{N}_2$  gas in flame-dried glassware using standard vacuum-line techniques. Tetrahydrofuran (THF) and  $\text{CH}_2\text{Cl}_2$  for reactions were purified by passing through a solvent purification system (Glass Contour). All work-up and purification procedures were carried out with reagent-grade solvents in air. The word “r.t. (room temperature) in this Supporting Information means 25 °C.

Analytical thin-layer chromatography (TLC) was performed using E. Merck silica gel 60 F254 precoated plates (0.25 mm). The developed chromatogram was analyzed by UV lamp (254 nm) or phosphomolybdic acid/sulfuric acid solution. Flash column chromatography was performed with E. Merck silica gel 60 (230–400 mesh). Preparative thin-layer chromatography (PTLC) was performed using Wakogel B5-F silica coated plates (0.75 mm) prepared in our laboratory. Preparative recycling gel permeation chromatography (GPC) was performed with either YMC LC-Forte/R instrument equipped with YMC-GPC T4000/YMC-GPC T30000 columns using  $\text{CHCl}_3$  as an eluent, or LC-9210II NEXT instrument (Japan Analytical Industry Ltd.) equipped with an in-line JAIGEL-1H/2H or JAIGEL-1HR/2HR columns using  $\text{CHCl}_3$  as an eluent. The high-resolution mass spectra (HRMS) were conducted on Thermo Fisher Scientific Exactive. Nuclear magnetic resonance (NMR) spectra were recorded on a JEOL JNM-ECA-400 ( $^1\text{H}$  400 MHz,  $^{13}\text{C}$  100 MHz), a JEOL JNM-ECA-500 ( $^1\text{H}$  500 MHz,  $^{13}\text{C}$  126 MHz) and JEOL JNM-ECA-600 ( $^1\text{H}$  600 MHz,  $^{13}\text{C}$  150 MHz) spectrometer. Chemical shifts for  $^1\text{H}$  NMR are expressed in parts per million (ppm) relative to tetramethylsilane ( $\delta$  0.00 ppm) or residual peak of  $\text{CD}_3\text{CN}$  ( $\delta$  1.94 ppm), acetone- $d_6$  ( $\delta$  2.05 ppm),  $\text{CD}_2\text{Cl}_2$  ( $\delta$  5.32 ppm), cyclohexane- $d_{12}$  ( $\delta$  1.38 ppm). Chemical shifts for  $^{13}\text{C}$  NMR are expressed in ppm relative to  $\text{CDCl}_3$  ( $\delta$  77.1 ppm) or cyclohexane- $d_{12}$  ( $\delta$  26.4 ppm). Data are reported as follows: chemical shift, multiplicity (s = singlet, d = doublet, dd = doublet of doublets, ddd = doublet of doublets of doublets, t = triplet, td = triplet of doublets, q = quartet, dq = doublet of quartets, sep = septet, m = multiplet, brs = broad singlet, brd = broad doublet), coupling constant (Hz), and integration. NMR yields were determined using dibromomethane as an internal NMR standard.

## 2. Ligand Screening

*Note* : Reaction procedure is same as General Procedure 1 in Section 5.

**Table S1.** Ligands screening for C–H arylation of cubane diamide **1a**

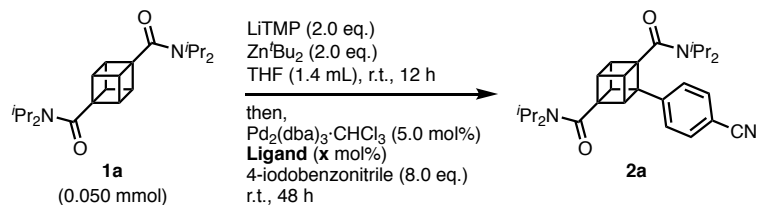

| entry                   | Ligand                                                          | x         | <b>2a</b> <sup>[a]</sup> |
|-------------------------|-----------------------------------------------------------------|-----------|--------------------------|
| 1                       | PPh <sub>3</sub>                                                | 40        | 28%                      |
| 2                       | P(2-furyl) <sub>3</sub>                                         | 40        | N.D.                     |
| 3                       | dppe                                                            | 40        | 2%                       |
| 4                       | dppp                                                            | 40        | 13%                      |
| 5                       | P(OPh) <sub>3</sub>                                             | 40        | 58%                      |
| <b>6</b> <sup>[b]</sup> | P(OPh) <sub>3</sub>                                             | <b>80</b> | <b>84%</b>               |
| 7 <sup>[b]</sup>        | P(OPh) <sub>3</sub>                                             | 60        | 19%                      |
| 8 <sup>[b]</sup>        | P(OPh) <sub>3</sub>                                             | 100       | 3%                       |
| 9                       | P(OEt) <sub>3</sub>                                             | 40        | 1%                       |
| 10                      | P(OC <sub>6</sub> H <sub>4</sub> CF <sub>3</sub> ) <sub>3</sub> | 40        | <1%                      |

<sup>[a]</sup> <sup>1</sup>H NMR yield

<sup>[b]</sup> Pd<sub>2</sub>(dba)<sub>3</sub>·CHCl<sub>3</sub> (10 mol%)

### 3. Synthesis of Starting Materials

#### Cubane-1,4-bis(*N,N*-diisopropylamide) **1a**

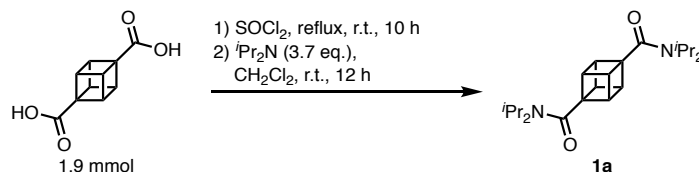

To a 100-mL two-necked round-bottomed flask containing a magnetic stirring bar were added 1,4-cubanedicarboxylic acid (365 mg, 1.9 mmol) and thionyl chloride (4.0 mL) under N<sub>2</sub> atmosphere. After heated at reflux for 10 h, excess thionyl chloride was removed under reduced pressure and the obtained residue was dissolved in CH<sub>2</sub>Cl<sub>2</sub> (11 mL). Diisopropylamine (1.0 mL, 7.1 mmol, 3.7 equiv) were added with ice cooling and stirring. After stirring for 12 h at room temperature, the reaction was quenched with aq. Na<sub>2</sub>CO<sub>3</sub> (10 mL). The amide was extracted with CH<sub>2</sub>Cl<sub>2</sub> (10 mL x 3). The organic layer was dried over Na<sub>2</sub>SO<sub>4</sub> (ca. 5 g) and concentrated in vacuo. The purification by column chromatography on silica gel (EtOAc only) gave **1a** as a white solid (540 mg, 1.5 mmol, 79%). <sup>1</sup>H NMR (600 MHz, CDCl<sub>3</sub>) δ 4.14 (s, 6H), 3.51 (sep, *J* = 6.5 Hz, 2H), 3.31 (sep, *J* = 6.9 Hz, 2H), 1.42 (d, *J* = 6.9 Hz, 12H), 1.22 (d, *J* = 6.5 Hz, 12H) ppm. <sup>13</sup>C NMR (151 MHz, CDCl<sub>3</sub>) δ 170.5, 58.5, 48.5, 46.3, 46.0, 21.2, 20.7 ppm. HR-MS (ESI-MS, positive): *m/z* = 359.2691 calcd for C<sub>22</sub>H<sub>35</sub>N<sub>2</sub>O<sub>2</sub>: 359.2693 [M + H]<sup>+</sup>.

#### Cyanocubaneamide **1b'**

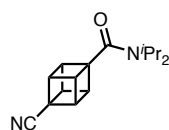

**1b'** was prepared from 1,4-cubanedicarboxylic acid following a literature procedure.<sup>[S6]</sup> Recrystallized from THF/*n*-hexane, white solid. Spectral and physical data in accordance with the literature.<sup>[S6]</sup>

### 4. Preparation of the Reagent TMPZn<sup>*t*</sup>Bu<sub>2</sub>Li

#### Preparation of LiTMP solution<sup>[S7]</sup>

According to a literature procedure, a 20-mL Schlenk tube equipped with J. Young® O-ring tap containing a magnetic stirring bar was charged with 2,2,6,6-tetramethylpiperidine (TMP-H) (190 μL, 1.1 mmol, 1.10 equiv) and THF (2.0 mL) in a glovebox under argon. The mixture

was cooled at  $-78\text{ }^{\circ}\text{C}$  and  $n\text{-BuLi}$  (1.59 M in  $n\text{-hexane}$ , 630  $\mu\text{L}$ , 1.0 mmol, 1.0 equiv) was added to the mixture. The mixture was stirred at  $0\text{ }^{\circ}\text{C}$  for 1 h.

#### Preparation of $\text{TMPZn}^t\text{Bu}_2\text{Li}$ solution (0.17 M in THF) <sup>[S7]</sup>

According to a literature procedure, a 20-mL Schlenk tube equipped with J. Young® O-ring tap containing a magnetic stirring bar was charged with  $\text{ZnCl}_2$  (136 mg, 1.0 mmol, 1.0 equiv) and THF (2.0 mL) in a glovebox under argon. The mixture was cooled at  $-78\text{ }^{\circ}\text{C}$  and  $t\text{-BuLi}$  (1.61 M in  $n\text{-pentane}$ , 1.3 mL, 2.1 mmol, 2.1 equiv) was added to the mixture. The mixture was stirred at  $0\text{ }^{\circ}\text{C}$  for 1 h and LiTMP solution was added to the mixture at  $-78\text{ }^{\circ}\text{C}$ . The mixture was stirred at  $0\text{ }^{\circ}\text{C}$  for 1 h to give  $\text{TMPZn}^t\text{Bu}_2\text{Li}$  solution (0.17 M in THF).

## **5. General Procedure for Pd-catalyzed Arylation of Cubane**

### General Procedure 1

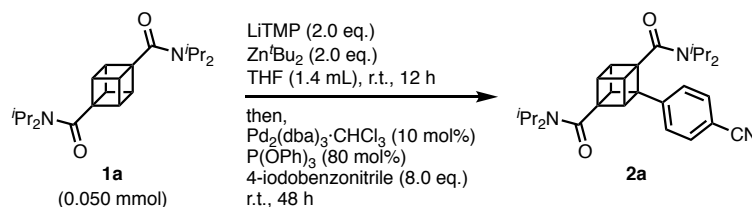

A 20-mL Schlenk tube equipped with J. Young® O-ring tap containing a magnetic stirring bar was charged with **1a** (17.9 mg, 0.050 mmol) and THF (800  $\mu\text{L}$ ) under  $\text{N}_2$  atmosphere. To the mixture,  $\text{TMPZn}^t\text{Bu}_2\text{Li}$  solution (0.17 M in THF, 600  $\mu\text{L}$ , 0.10 mmol, 2.0 equiv) was added at room temperature. After stirring at room temperature for 12 h,  $\text{Pd}_2(\text{dba})_3\cdot\text{CHCl}_3$  (5.2 mg, 5.0  $\mu\text{mol}$ , 10 mol%), triphenyl phosphite (11  $\mu\text{L}$ , 40  $\mu\text{mol}$ , 80 mol%) and 4-iodobenzonitrile (91.6 mg, 0.40 mmol, 8.0 equiv) were added and the solution was stirred for 48 h. Then the reaction mixture was quenched with aq.  $\text{NH}_4\text{Cl}$ . Then resulting mixture was extracted with  $\text{CH}_2\text{Cl}_2$  three times. The organic extracts were dried over  $\text{Na}_2\text{SO}_4$ , and concentrated. The residue was then purified by silica gel chromatography ( $\text{EtOAc}/\text{CHCl}_3 = 1/10$ ) and then GPC.

### General Procedure 2

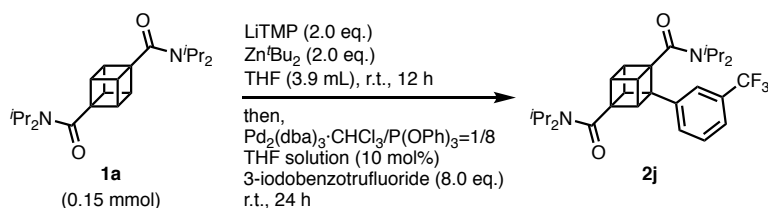

A 20-mL Schlenk tube equipped with J. Young® O-ring tap containing a magnetic stirring bar was charged with **1a** (53.8 mg, 0.15 mmol) and THF (2.1 mL) under  $\text{N}_2$  atmosphere. To the mixture,  $\text{TMPZn}^t\text{Bu}_2\text{Li}$  solution (0.17 M in THF, 1.8 mL, 0.30 mmol, 2.0 equiv) was added at

room temperature and the reaction mixture was stirred at room temperature for 12 h.  $\text{Pd}_2(\text{dba})_3 \cdot \text{CHCl}_3 / \text{P}(\text{OPh})_3$  solution ( $\text{Pd}_2(\text{dba})_3 \cdot \text{CHCl}_3$ : 0.050 M in THF) was prepared from  $\text{Pd}_2(\text{dba})_3 \cdot \text{CHCl}_3$  (51.8 mg, 0.050 mmol), triphenyl phosphite (105  $\mu\text{L}$ , 0.40 mmol) and THF (1.0 mL). To the reaction mixture,  $\text{Pd}_2(\text{dba})_3 \cdot \text{CHCl}_3 / \text{P}(\text{OPh})_3$  solution ( $\text{Pd}_2(\text{dba})_3 \cdot \text{CHCl}_3$ : 0.050 M in THF, 300  $\mu\text{L}$ , 15  $\mu\text{mol}$ , 10 mol%) and 3-iodobenzotrifluoride (173  $\mu\text{L}$ , 1.2 mmol, 8.0 equiv) were added and the solution was stirred for 24 h. Then the reaction mixture was quenched with aq.  $\text{NH}_4\text{Cl}$ . Then resulting mixture was extracted with  $\text{CH}_2\text{Cl}_2$  three times. The organic extracts were dried over  $\text{Na}_2\text{SO}_4$ , and concentrated. The residue was then purified by silica gel chromatography ( $\text{EtOAc}/\text{CHCl}_3 = 1/10$ ) and then GPC.

#### 4-CN arylcubane **2a**

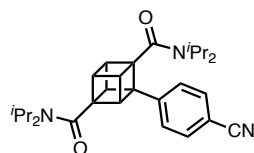

**2a** was prepared according to General Procedure 1 as a white solid. Purification by silica gel chromatography ( $\text{EtOAc}/\text{CHCl}_3 = 1/10$ ) and then GPC gave **2a** (17.6 mg, 0.038 mmol, 76%).  $^1\text{H}$  NMR (600 MHz,  $\text{CDCl}_3$ )  $\delta$  7.64 (d,  $J = 8.5$  Hz, 2H), 7.29 (d,  $J = 8.6$  Hz, 2H), 4.37–4.40 (m, 2H), 4.24–4.28 (m, 2H), 4.17–4.20 (m, 1H), 3.49 (sep,  $J = 6.6$  Hz, 1H), 3.31 (sep,  $J = 6.8$  Hz, 1H), 3.12 (sep,  $J = 6.8$  Hz, 1H), 3.06 (sep,  $J = 6.5$  Hz, 1H), 1.41 (d,  $J = 6.8$  Hz, 6H), 1.30 (d,  $J = 6.8$  Hz, 6H), 1.17 (d,  $J = 6.7$  Hz, 6H), 0.64 (d,  $J = 6.5$  Hz, 6H) ppm.  $^{13}\text{C}$  NMR (150 MHz,  $\text{CDCl}_3$ )  $\delta$  169.5, 168.0, 144.4, 132.5, 126.5, 118.9, 110.7, 62.7, 59.4, 55.4, 50.3, 48.8, 48.8, 46.8, 46.2, 46.1, 43.6, 21.1, 20.9, 20.7, 20.5 ppm. HR-MS (ESI-MS, positive) :  $m/z = 482.2773$ . calcd for  $\text{C}_{29}\text{H}_{37}\text{N}_3\text{NaO}$  : 482.2778  $[\text{M} + \text{Na}]^+$ .

#### 4-CF<sub>3</sub> arylcubane **2b**

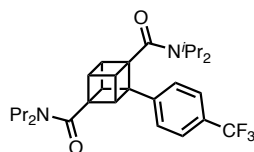

**2b** was prepared according to General Procedure 1 with 4-iodobenzotrifluoride (58  $\mu\text{L}$ , 0.40 mmol) as a white solid. Purification by silica gel chromatography ( $\text{EtOAc}/\text{CHCl}_3 = 1/10$ ) and then GPC gave **2b** (20.6 mg, 0.041 mmol, 82%).  $^1\text{H}$  NMR (600 MHz,  $\text{CDCl}_3$ )  $\delta$  7.60 (d,  $J = 8.0$  Hz, 2H), 7.29 (d,  $J = 8.0$  Hz, 2H), 4.36–4.40 (m, 2H), 4.23–4.28 (m, 2H), 4.18–4.22 (m, 1H), 3.51 (sep,  $J = 6.5$  Hz, 1H), 3.30 (sep,  $J = 6.7$  Hz, 1H), 3.03–3.15 (m, 2H), 1.42 (d,  $J = 6.7$  Hz, 6H), 1.30 (d,  $J = 6.7$  Hz, 6H), 1.16 (d,  $J = 6.7$  Hz, 6H), 0.61 (d,  $J = 6.5$  Hz, 6H) ppm.  $^{13}\text{C}$  NMR (150 MHz,  $\text{CDCl}_3$ )  $\delta$  169.7, 168.3, 143.1, 129.3 (q,  $J = 33.0$  Hz), 126.0, 125.6 (d,  $J$

= 4.3 Hz), 124.2 (q,  $J$  = 270.0 Hz), 62.6, 59.4, 55.4, 50.4, 48.8, 48.7, 46.6, 46.2, 46.1, 43.6, 21.1, 20.8, 20.7, 20.5 ppm. HR-MS (ESI-MS, positive) :  $m/z$  = 525.2699. calcd for  $C_{29}H_{37}N_2NaO_2F_3$  : 525.2699  $[M + Na]^+$ .

#### 4-<sup>t</sup>Bu arylcubane **2c**

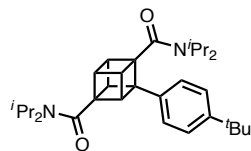

**2c** was prepared according to General Procedure 1 with 1-tert-butyl-4-iodobenzene (71  $\mu$ L, 0.40 mmol) as a white solid. Purification by silica gel chromatography (EtOAc/ $CHCl_3$  = 1/10) and then PTLC (EtOAc/benzene = 1/2) gave **2c** (14.5 mg, 0.030 mmol, 59%).  $^1H$  NMR (600 MHz,  $CDCl_3$ )  $\delta$  7.34 (d,  $J$  = 8.6 Hz, 2H), 7.10 (d,  $J$  = 8.6 Hz, 2H), 4.33–4.36 (m, 2H), 4.20–4.23 (m, 2H), 4.16–4.20 (m, 1H), 3.57 (sep,  $J$  = 6.7 Hz, 1H), 3.29 (sep,  $J$  = 6.7 Hz, 1H), 3.04–3.12 (m, 2H), 1.41 (d,  $J$  = 6.7 Hz, 6H), 1.30 (d,  $J$  = 6.7 Hz, 6H), 1.28 (s, 9H), 1.15 (d,  $J$  = 6.5 Hz, 6H), 0.55 (d,  $J$  = 6.7 Hz, 6H) ppm.  $^{13}C$  NMR (150 MHz,  $CDCl_3$ )  $\delta$  170.2, 169.0, 150.2, 136.1, 125.4, 125.3, 62.7, 59.7, 55.2, 50.3, 48.9, 48.6, 46.5, 46.1, 45.9, 43.4, 34.7, 31.5, 21.1, 20.7, 20.5, 20.5 ppm. HR-MS (ESI-MS, positive) :  $m/z$  = 513.3449. calcd for  $C_{32}H_{46}N_2NaO_2$  : 513.3451  $[M + Na]^+$ .

#### 4-Me arylcubane **2d**

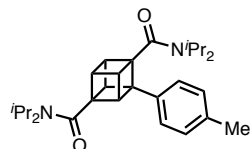

**2d** was prepared according to General Procedure 1 with 4-iodotoluene (87.2 mg, 0.40 mmol) as a white solid. Purification by silica gel chromatography (EtOAc/ $CHCl_3$  = 1/10) and then GPC gave **2d** (11.0 mg, 0.025 mmol, 49%).  $^1H$  NMR (600 MHz,  $CDCl_3$ )  $\delta$  7.13 (d,  $J$  = 7.9 Hz, 2H), 7.05 (d,  $J$  = 8.0 Hz, 2H), 4.30–4.33 (m, 2H), 4.17–4.23 (m, 3H), 3.54 (sep,  $J$  = 6.6 Hz, 1H), 3.28 (sep,  $J$  = 6.8 Hz, 1H), 3.05–3.16 (m, 2H), 2.32 (s, 3H), 1.41 (d,  $J$  = 6.8 Hz, 6H), 1.31 (d,  $J$  = 6.8 Hz, 6H), 1.13 (d,  $J$  = 6.6 Hz, 6H), 0.60 (d,  $J$  = 6.5 Hz, 6H) ppm.  $^{13}C$  NMR (151 MHz,  $CDCl_3$ )  $\delta$  170.2, 169.0, 136.6, 136.2, 129.3, 125.5, 62.6, 59.8, 55.2, 50.5, 48.9, 48.6, 46.3, 46.1, 45.9, 43.3, 21.3, 21.0, 20.7, 20.7, 20.5 ppm. HR-MS (ESI-MS, positive) :  $m/z$  = 471.2976. calcd for  $C_{29}H_{40}N_2NaO_2$  : 471.2982  $[M + Na]^+$ .

#### 4-Ph arylcubane **2e**

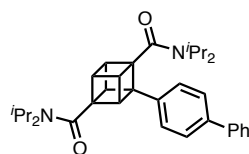

**2e** was prepared according to General Procedure 1 with 4-iodobiphenyl (112.0 mg, 0.40 mmol) as a white solid. Purification by silica gel chromatography (EtOAc/CHCl<sub>3</sub> = 1/10) and then GPC gave **2e** (12.2 mg, 0.024 mmol, 48%). <sup>1</sup>H NMR (600 MHz, acetone-*d*<sub>6</sub>) δ 7.70 (d, *J* = 8.2 Hz, 2H), 7.66 (dd, *J* = 8.4, 1.2 Hz, 2H), 7.45 (t, *J* = 7.7 Hz, 2H), 7.35 (t, *J* = 7.4 Hz, 1H), 7.30 (d, *J* = 8.2 Hz, 2H), 4.42–4.45 (m, 2H), 4.21–4.25 (m, 2H), 4.15–4.18 (m, 1H), 3.65 (sep, *J* = 6.9 Hz, 1H), 3.39 (sep, *J* = 6.9 Hz, 1H), 3.25 (sep, *J* = 6.9 Hz, 1H), 3.18 (sep, *J* = 6.9 Hz, 1H), 1.38 (d, *J* = 6.9 Hz, 6H), 1.28 (d, *J* = 6.9 Hz, 6H), 1.20 (d, *J* = 6.9 Hz, 6H), 0.68 (d, *J* = 6.5 Hz, 6H) ppm. <sup>13</sup>C NMR (151 MHz, CDCl<sub>3</sub>) δ 170.1, 168.8, 140.8, 139.8, 138.2, 129.0, 127.5, 127.3, 127.1, 126.1, 62.7, 59.7, 55.3, 50.5, 48.9, 48.7, 46.4, 46.1, 46.0, 43.5, 21.1, 20.8, 20.7, 20.6 ppm. HR-MS (ESI-MS, positive) : *m/z* = 533.3138 calcd for C<sub>34</sub>H<sub>42</sub>N<sub>2</sub>NaO<sub>2</sub> : 533.3138 [M + Na]<sup>+</sup>.

#### 4-CO<sub>2</sub>Et arylcubane **2f**

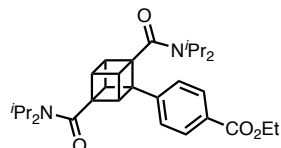

**2f** was prepared according to General Procedure 1 with ethyl 4-iodobenzoate (67 μL, 0.40 mmol) as a pale-orange solid. Purification by silica gel chromatography (EtOAc/CHCl<sub>3</sub> = 1/10) and then GPC gave **2f** (13.1 mg, 0.026 mmol, 52%). <sup>1</sup>H NMR (600 MHz, CDCl<sub>3</sub>) δ 8.02 (d, *J* = 8.3 Hz, 2H), 7.24 (d, *J* = 8.3 Hz, 2H), 4.35–4.40 (m, 4H), 4.23–4.27 (m, 2H), 4.19–4.23 (m, 1H), 3.50 (sep, *J* = 6.6 Hz, 1H), 3.30 (sep, *J* = 6.8 Hz, 1H), 3.05–3.13 (m, 2H), 1.38–1.44 (m, 9H), 1.30 (d, *J* = 6.8 Hz, 6H), 1.14 (d, *J* = 6.6 Hz, 6H), 0.61 (d, *J* = 6.6 Hz, 6H) ppm. <sup>13</sup>C NMR (151 MHz, CDCl<sub>3</sub>) δ 169.8, 168.4, 166.5, 144.2, 130.0, 129.1, 125.5, 62.7, 61.2, 59.7, 55.4, 50.6, 48.8, 48.7, 46.4, 46.2, 46.0, 43.5, 21.0, 20.9, 20.7, 20.5, 14.5 ppm. HR-MS (ESI-MS, positive) : *m/z* = 529.3037 calcd for C<sub>31</sub>H<sub>42</sub>N<sub>2</sub>NaO<sub>4</sub> : 529.3037 [M + Na]<sup>+</sup>.

#### 4-SO<sub>2</sub>NEt<sub>2</sub> arylcubane **2g**

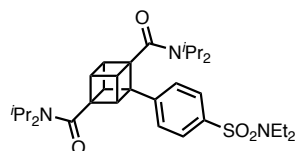

**2g** was prepared according to General Procedure 1 with *N,N*-diethyl-4-iodobenzene sulfonamide (135.7 mg, 0.40 mmol) as a white solid. Purification by silica gel chromatography (EtOAc/CHCl<sub>3</sub> = 1/10) and then PTLC (CH<sub>3</sub>CN/CH<sub>2</sub>Cl<sub>2</sub> = 1/3) gave **2g** (14.6 mg, 0.026 mmol, 51%). <sup>1</sup>H NMR (600 MHz, CDCl<sub>3</sub>) δ 7.79 (d, *J* = 8.6 Hz, 2H), 7.30 (d, *J* = 8.6 Hz, 2H), 4.37–4.40 (m, 2H), 4.24–4.28 (m, 2H), 4.17–4.21 (m, 1H), 3.50 (sep, *J* = 6.7 Hz, 1H), 3.31 (sep, *J* = 6.8 Hz, 1H), 3.20 (q, *J* = 7.2 Hz, 4H), 3.03–3.14 (m, 2H), 1.42 (d, *J* = 6.7 Hz, 6H), 1.29 (d, *J* = 6.7 Hz, 6H), 1.16 (d, *J* = 6.6 Hz, 6H), 1.12 (t, *J* = 7.1 Hz, 6H), 0.62 (d, *J* = 6.5 Hz, 6H) ppm. <sup>13</sup>C NMR (151 MHz, CDCl<sub>3</sub>) δ 169.7, 168.1, 143.7, 139.0, 127.5, 126.2, 62.7, 59.4, 55.4, 50.3, 48.8, 48.7, 46.7, 46.2, 46.1, 43.6, 42.1, 21.1, 20.9, 20.7, 20.5, 14.3 ppm. HR-MS (ESI-MS, positive) : *m/z* = 592.3177. calcd for C<sub>32</sub>H<sub>47</sub>N<sub>3</sub>NaO<sub>4</sub>S : 592.3179 [M + Na]<sup>+</sup>.

#### 4-CONEt<sub>2</sub> arylcubane **2h**

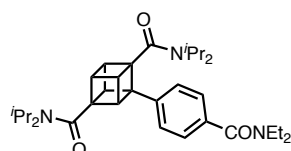

**2h** was prepared according to General Procedure 1 with *N,N*-diethyl-4-iodobenzenamide (121.3 mg, 0.40 mmol) as a white solid. Purification by silica gel chromatography (EtOAc/CHCl<sub>3</sub> = 1/10) and then PTLC (THF/benzene = 1/1) gave **2h** (9.9 mg, 0.019 mmol, 37%). <sup>1</sup>H NMR (600 MHz, CDCl<sub>3</sub>) δ 7.35 (d, *J* = 8.2 Hz, 2H), 7.20 (d, *J* = 8.3 Hz, 2H), 4.34–4.37 (m, 2H), 4.21–4.25 (m, 2H), 4.18–4.21 (m, 1H), 3.46–3.57 (m, 3H), 3.29 (sep, *J* = 6.8 Hz, 1H), 3.14–3.25 (brs, 2H), 3.05–3.14 (m, 2H), 1.41 (d, *J* = 6.7 Hz, 6H), 1.29 (d, *J* = 6.8 Hz, 6H), 1.18–1.27 (brs, 3H), 1.13 (d, *J* = 6.6 Hz, 6H), 0.99–1.11 (brs, 3H), 0.62 (d, *J* = 6.5 Hz, 6H) ppm. <sup>13</sup>C NMR (151 MHz, CDCl<sub>3</sub>) δ 171.1, 170.0, 168.6, 140.2, 136.0, 126.8, 125.6, 62.6, 59.6, 55.3, 50.5, 48.7, 48.7, 46.3, 46.2, 46.0, 43.5, 43.4, 39.6, 21.0, 20.8, 20.7, 20.5, 14.3, 13.1 ppm. HR-MS (ESI-MS, positive) : *m/z* = 556.3505. calcd for C<sub>33</sub>H<sub>47</sub>N<sub>3</sub>NaO<sub>3</sub> : 556.3510 [M + Na]<sup>+</sup>.

#### 3-Me arylcubane **2i**

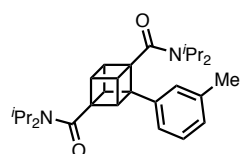

**2i** was prepared according to General Procedure 1 with 3-iodotoluene (51 μL, 0.40 mmol) as a white solid. Purification by silica gel chromatography (EtOAc/CHCl<sub>3</sub> = 1/10) and then PTLC (EtOAc/benzene = 1/2) gave **2i** (12.3 mg, 0.027 mmol, 55%). <sup>1</sup>H NMR (600 MHz,

CDCl<sub>3</sub>)  $\delta$  7.22 (t,  $J$  = 7.6 Hz, 1H),  $\delta$  7.02 (d,  $J$  = 7.6 Hz, 1H),  $\delta$  6.98 (s, 1H),  $\delta$  6.96 (d,  $J$  = 7.6 Hz, 1H), 4.33–4.35 (m, 2H), 4.17–4.24 (m, 3H), 3.55 (sep,  $J$  = 6.6 Hz, 1H), 3.29 (sep,  $J$  = 6.8 Hz, 1H), 3.04–3.15 (m, 2H), 2.31 (s, 3H), 1.41 (d,  $J$  = 6.8 Hz, 6H), 1.31 (d,  $J$  = 6.8 Hz, 6H), 1.14 (d,  $J$  = 6.6 Hz, 6H), 0.58 (d,  $J$  = 6.5 Hz, 6H) ppm. <sup>13</sup>C NMR (151 MHz, CDCl<sub>3</sub>)  $\delta$  170.2, 168.9, 139.0, 138.3, 128.5, 127.7, 126.2, 122.5, 62.6, 59.9, 55.2, 50.4, 48.9, 48.6, 46.3, 46.1, 45.9, 43.4, 21.4, 21.0, 20.7, 20.7, 20.5 ppm. HR-MS (ESI-MS, positive) :  $m/z$  = 471.2978 calcd for C<sub>29</sub>H<sub>40</sub>N<sub>2</sub>NaO<sub>2</sub> : 471.2982 [M + Na]<sup>+</sup>.

### 3-CF<sub>3</sub> arylcubane **2j**

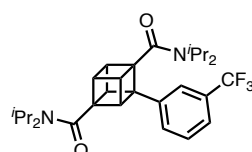

**2j** was prepared according to General Procedure 2 as a white solid. Purification by silica gel chromatography (EtOAc/CHCl<sub>3</sub> = 1/10) and then GPC gave **2j** (38.5 mg, 0.077 mmol, 51%). <sup>1</sup>H NMR (600 MHz, CDCl<sub>3</sub>)  $\delta$  7.45–7.52 (m, 2H), 7.37–7.42 (m, 2H), 4.38–4.41 (m, 2H), 4.24–4.28 (m, 2H), 4.19–4.23 (m, 1H), 3.51 (sep,  $J$  = 6.7 Hz, 1H), 3.30 (sep,  $J$  = 6.7 Hz, 1H), 3.03–3.13 (m, 2H), 1.42 (d,  $J$  = 6.7 Hz, 6H), 1.29 (d,  $J$  = 6.7 Hz, 6H), 1.15 (d,  $J$  = 6.7 Hz, 6H), 0.60 (d,  $J$  = 6.7 Hz, 6H) ppm. <sup>13</sup>C NMR (151 MHz, CDCl<sub>3</sub>)  $\delta$  169.8, 168.2, 140.2, 131.2 (q,  $J$  = 31.8 Hz), 129.3, 129.2, 124.1 (q,  $J$  = 273.2 Hz), 123.8 (d,  $J$  = 4.5 Hz), 122.2 (d,  $J$  = 3.0 Hz), 62.6, 59.4, 55.3, 50.3, 48.9, 48.7, 46.4, 46.1, 46.0, 43.5, 21.0, 20.7, 20.7, 20.4 ppm. HR-MS (ESI-MS, positive) :  $m/z$  = 525.2692 calcd for C<sub>29</sub>H<sub>37</sub>N<sub>2</sub>NaO<sub>2</sub>F<sub>3</sub> : 525.2699 [M + Na]<sup>+</sup>.

### 2-naphthyl arylcubane **2k**

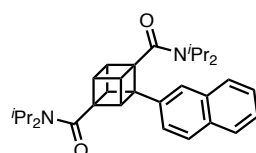

**2k** was prepared according to General Procedure 1 with 2-iodonaphthalene (59.8 mg, 0.40 mmol) as a white solid. Purification by silica gel chromatography (EtOAc/CHCl<sub>3</sub> = 1/10) and then GPC gave **2k** (13.9 mg, 0.029 mmol, 57%). <sup>1</sup>H NMR (500 MHz, CDCl<sub>3</sub>)  $\delta$  7.76–7.84 (m, 3H), 7.59 (s, 1H), 7.43–7.50 (m, 2H), 7.31 (dd,  $J$  = 8.6, 1.7 Hz, 1H), 4.43–4.48 (m, 2H), 4.26–4.31 (m, 2H), 4.22–4.26 (m, 1H), 3.60 (sep,  $J$  = 6.6 Hz, 1H), 3.30 (sep,  $J$  = 6.9 Hz, 1H), 3.19 (sep,  $J$  = 6.6 Hz, 1H), 3.03 (sep,  $J$  = 6.9 Hz, 1H), 1.42 (d,  $J$  = 6.9 Hz, 6H), 1.29 (d,  $J$  = 6.9 Hz, 6H), 1.14 (d,  $J$  = 6.6 Hz, 6H), 0.49 (d,  $J$  = 6.6 Hz, 6H) ppm. <sup>13</sup>C NMR (126 MHz, CDCl<sub>3</sub>)  $\delta$  170.2, 168.9, 136.7, 133.4, 132.5, 128.6, 127.9, 127.8, 126.5, 125.9, 123.9, 123.8, 62.7, 60.2,

55.3, 50.5, 48.9, 48.7, 46.4, 46.1, 45.9, 43.5, 21.0, 20.8, 20.7, 20.5 ppm. HR-MS (ESI-MS, positive) :  $m/z$  = 507.2978. calcd for  $C_{32}H_{40}N_2NaO_2$  : 507.2982  $[M + Na]^+$ .

### 2-Me arylcubane 2l

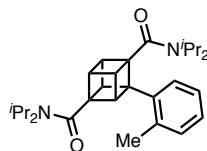

**2l** was prepared according to General Procedure 1 with 2-iodotoluene (51  $\mu$ L, 0.40 mmol) as a white solid. Purification by silica gel chromatography (EtOAc/ $CHCl_3$  = 1/10) and then PTLC (EtOAc/benzene = 1/2) gave **2l** (4.0 mg, 8.9  $\mu$ mol, 18%).  $^1H$  NMR (600 MHz,  $CDCl_3$ )  $\delta$  7.08–7.19 (m, 4H), 4.44–4.49 (m, 2H), 4.21–4.27 (m, 2H), 4.17–4.21 (m, 1H), 3.51 (sep,  $J$  = 6.5 Hz, 1H), 3.28 (sep,  $J$  = 6.7 Hz, 1H), 3.06–3.18 (m, 2H), 2.22 (s, 3H), 1.40 (d,  $J$  = 6.7 Hz, 6H), 1.30 (d,  $J$  = 6.9 Hz, 6H), 1.11 (d,  $J$  = 6.5 Hz, 6H), 0.57 (d,  $J$  = 6.4 Hz, 6H) ppm.  $^{13}C$  NMR (151 MHz,  $CDCl_3$ )  $\delta$  170.2, 169.8, 137.5, 136.5, 130.8, 127.4, 126.5, 125.7, 63.1, 62.3, 54.7, 49.1, 48.6, 46.1, 45.9, 42.7, 21.0, 20.8, 20.7, 20.4, 19.6 ppm. HR-MS (ESI-MS, positive) :  $m/z$  = 471.2977 calcd for  $C_{29}H_{40}N_2NaO_2$  : 471.2982  $[M + Na]^+$ .

### 2-CF<sub>3</sub> arylcubane 2m

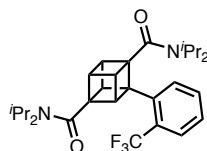

**2m** was prepared according to General Procedure 2 with **1a** (35.9 mg, 0.10 mmol) and 2-iodobenzotrifluoride (112  $\mu$ L, 0.80 mmol) as a white solid (the reaction time with **1a** and  $TMPZn^tBu_2Li$  : 1 h). Purification by silica gel chromatography (EtOAc/ $CHCl_3$  = 1/10) and then PTLC (EtOAc/benzene = 1/2) gave **2m** (9.5 mg, 18  $\mu$ mol, 19%).  $^1H$  NMR (600 MHz,  $CDCl_3$ )  $\delta$  7.66 (d,  $J$  = 7.7 Hz, 1H), 7.51–7.56 (m, 1H), 7.33–7.38 (m, 2H), 4.49–4.53 (m, 2H), 4.18–4.23 (m, 2H), 4.10–4.14 (m, 1H), 3.48 (sep,  $J$  = 6.5 Hz, 1H), 3.29 (sep,  $J$  = 6.7 Hz, 1H), 3.20 (sep,  $J$  = 6.5 Hz, 1H), 3.13 (sep,  $J$  = 6.7 Hz, 1H), 1.40 (d,  $J$  = 6.7 Hz, 6H), 1.31 (d,  $J$  = 6.9 Hz, 6H), 1.14 (d,  $J$  = 6.7 Hz, 6H), 0.68 (d,  $J$  = 6.5 Hz, 6H) ppm.  $^{13}C$  NMR (151 MHz,  $CDCl_3$ )  $\delta$  169.9, 168.7, 137.0, 131.9, 128.8, 127.8 (d,  $J$  = 31.7 Hz), 127.4 (q,  $J$  = 6.0 Hz), 127.3, 124.4 (q,  $J$  = 273.3 Hz), 64.0, 60.8, 54.7, 50.9, 48.7, 48.6, 46.5, 46.1, 46.0, 43.3, 21.0, 20.9, 20.7, 20.4 ppm. HR-MS (ESI-MS, positive) :  $m/z$  = 525.2701 calcd for  $C_{29}H_{37}N_2NaO_2F_3$  : 525.2699  $[M + Na]^+$ .

### 3-pyridyl arylcubane **2n**

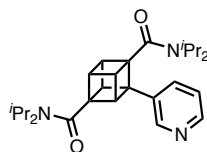

**2n** was prepared according to General Procedure 1 with  $\text{Pd}_2(\text{dba})_3 \cdot \text{CHCl}_3$  (10.4 mg, 10  $\mu\text{mol}$ , 20 mol%), triphenyl phosphite (21  $\mu\text{L}$ , 80  $\mu\text{mol}$ , 160 mol%) and 3-iodopyridine (82.0 mg, 0.40 mmol) as a white solid. Purification by silica gel chromatography ( $\text{EtOAc}/\text{CHCl}_3 = 1/10$ ) and then PTLC ( $\text{MeOH}/\text{benzene} = 1/3$ ) gave **2n** (11.7 mg, 0.027 mmol, 54%).  $^1\text{H}$  NMR (600 MHz,  $\text{CD}_2\text{Cl}_2$ )  $\delta$  8.45 (dd,  $J = 4.8, 1.4$  Hz, 1H), 8.41 (d,  $J = 1.7$  Hz, 1H), 7.48 (ddd,  $J = 7.9, 2.4, 1.7$  Hz, 1H), 7.27 (ddd,  $J = 7.9, 4.8, 0.7$  Hz, 1H), 4.37–4.41 (m, 2H), 4.23 (t,  $J = 5.0$  Hz, 2H), 4.12–4.16 (m, 1H), 3.51 (sep,  $J = 6.5$  Hz, 1H), 3.29 (sep,  $J = 6.9$  Hz, 1H), 3.06–3.18 (m, 2H), 1.37 (d,  $J = 6.9$  Hz, 6H), 1.26 (d,  $J = 6.5$  Hz, 6H), 1.15 (d,  $J = 6.5$  Hz, 6H), 0.65 (d,  $J = 6.5$  Hz, 6H) ppm.  $^{13}\text{C}$  NMR (151 MHz,  $\text{CDCl}_3$ )  $\delta$  169.7, 168.2, 148.5, 147.0, 134.5, 133.5, 123.6, 62.5, 57.6, 55.5, 50.1, 49.0, 48.7, 46.5, 46.2, 46.0, 43.7, 21.1, 20.9, 20.7, 20.5 ppm. HR-MS (ESI-MS, positive) :  $m/z = 458.2772$ . calcd for  $\text{C}_{27}\text{H}_{37}\text{N}_3\text{NaO}_2$  : 458.2778  $[\text{M} + \text{Na}]^+$ .

### 3-thienyl arylcubane **2o**

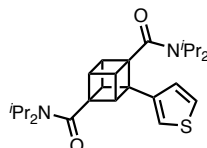

**2o** was prepared according to General Procedure 2 with **1a** (35.9 mg, 0.10 mmol),  $\text{Pd}_2(\text{dba})_3 \cdot \text{CHCl}_3/\text{P}(\text{OPh})_3$  solution ( $\text{Pd}_2(\text{dba})_3 \cdot \text{CHCl}_3$ :0.050 M in THF, 400  $\mu\text{L}$ , 20  $\mu\text{mol}$ , 20 mol%) and 3-iodothiophene (81  $\mu\text{L}$ , 0.80 mmol) as a white solid (the reaction time for cross coupling : 48 h). Purification by silica gel chromatography ( $\text{EtOAc}/\text{CHCl}_3 = 1/10$ ) and then PTLC (Acetone/benzene = 1/3 + one drop of  $\text{NEt}_3$ ) gave **2o** (9.9 mg, 22  $\mu\text{mol}$ , 22%).  $^1\text{H}$  NMR (600 MHz,  $\text{CDCl}_3$ )  $\delta$  7.30 (dd,  $J = 5.0, 2.9$  Hz, 1H), 7.00 (dd,  $J = 2.9, 1.2$  Hz, 1H), 6.96 (dd,  $J = 5.0, 1.2$  Hz, 1H), 4.27–4.30 (m, 2H), 4.20–4.23 (m, 2H), 4.15–4.19 (m, 1H), 3.57 (sep,  $J = 6.7$  Hz, 1H), 3.30 (sep,  $J = 6.7$  Hz, 1H), 3.20 (sep,  $J = 6.5$  Hz, 1H), 3.14 (sep,  $J = 6.9$  Hz, 1H), 1.41 (d,  $J = 6.7$  Hz, 6H), 1.33 (d,  $J = 6.9$  Hz, 6H), 1.15 (d,  $J = 6.5$  Hz, 6H), 0.69 (d,  $J = 6.7$  Hz, 6H) ppm.  $^{13}\text{C}$  NMR (151 MHz,  $\text{CDCl}_3$ )  $\delta$  170.1, 168.9, 140.8, 126.7, 125.7, 120.3, 62.8, 56.6, 55.5, 51.0, 49.2, 48.6, 46.3, 46.1, 46.0, 43.6, 21.1, 20.7, 20.5 ppm. HR-MS (ESI-MS, positive) :  $m/z = 463.2379$  calcd for  $\text{C}_{26}\text{H}_{36}\text{N}_2\text{NaO}_2\text{S}$  : 463.2390  $[\text{M} + \text{Na}]^+$ .

## 1-isoquinolinyl arylcubane **2p**

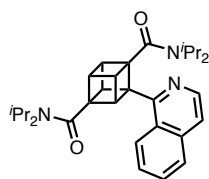

**2p** was prepared according to General Procedure 1 with  $\text{Pd}_2(\text{dba})_3 \cdot \text{CHCl}_3$  (10.4 mg, 10  $\mu\text{mol}$ , 20 mol%), triphenyl phosphite (21  $\mu\text{L}$ , 80  $\mu\text{mol}$ , 160 mol%) and 1-iodoisoquinoline (102.0 mg, 0.40 mmol) as a white solid. Purification by silica gel chromatography ( $\text{EtOAc}/\text{CHCl}_3 = 1/10$ ) and then PTLC ( $\text{EtOAc}/\text{benzene} = 1/2$ ) gave **2p** (13.1 mg, 0.027 mmol, 54%).  $^1\text{H}$  NMR (600 MHz,  $\text{CDCl}_3$ )  $\delta$  8.47 (d,  $J = 5.7$  Hz, 1H), 7.85 (dd,  $J = 8.4, 0.7$  Hz, 1H), 7.81 (d,  $J = 8.1$  Hz, 1H), 7.65–7.69 (m, 1H), 7.58–7.62 (m, 1H), 7.51 (d,  $J = 5.4$  Hz, 1H), 4.72–4.80 (brs, 2H), 4.40–4.47 (m, 2H), 4.32–4.36 (m, 1H), 3.58 (sep,  $J = 6.6$  Hz, 1H), 3.28 (sep,  $J = 6.8$  Hz, 1H), 3.22 (sep,  $J = 6.5$  Hz, 1H), 2.86 (sep,  $J = 6.8$  Hz, 1H), 1.41 (d,  $J = 6.8$  Hz, 6H), 1.06 (d,  $J = 6.6$  Hz, 6H), 0.94 (d,  $J = 6.6$  Hz, 6H), 0.41 (d,  $J = 5.1$  Hz, 6H) ppm.  $^{13}\text{C}$  NMR (151 MHz,  $\text{CDCl}_3$ )  $\delta$  170.2, 168.9, 158.3, 141.9, 136.1, 130.5, 127.5, 127.2, 126.6, 125.8, 119.9, 63.3, 62.2, 56.1, 50.3, 49.1, 48.6, 46.1, 45.6, 45.2, 43.7, 21.0, 20.7, 20.1 ppm. HR-MS (ESI-MS, positive) :  $m/z = 508.2929$  calcd for  $\text{C}_{31}\text{H}_{39}\text{N}_3\text{NaO}_2$  : 508.2934  $[\text{M} + \text{Na}]^+$ .

## 6. Synthesis of Multiply Arylated Cubanes

### Synthesis of monoarylcubane **2b'**

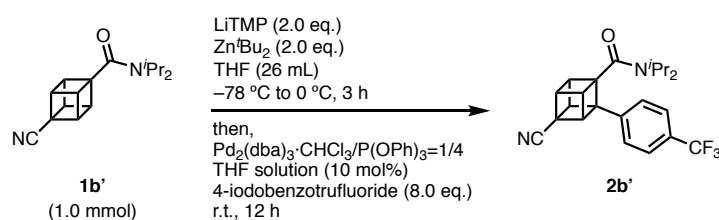

A 200-mL Schlenk tube equipped with J. Young® O-ring tap containing a magnetic stirring bar was charged with **1b'** (1.28 g, 5.0 mmol) and THF (25 mL) under  $\text{N}_2$  atmosphere. To the mixture,  $\text{TMPZn}^i\text{Bu}_2\text{Li}$  solution (0.17 M in THF, 12 mL, 2.0 mmol, 2.0 equiv) was added at  $-78$  °C and the reaction mixture was stirred at  $0$  °C for 3 h.  $\text{Pd}_2(\text{dba})_3 \cdot \text{CHCl}_3/\text{P}(\text{OPh})_3$  solution ( $\text{Pd}_2(\text{dba})_3 \cdot \text{CHCl}_3$ :0.050 M in THF) was prepared from  $\text{Pd}_2(\text{dba})_3 \cdot \text{CHCl}_3$  (621 mg, 0.60 mmol), triphenyl phosphite (1.26 mL, 4.8 mmol) and THF (12 mL). To the reaction mixture,  $\text{Pd}_2(\text{dba})_3 \cdot \text{CHCl}_3/\text{P}(\text{OPh})_3$  solution ( $\text{Pd}_2(\text{dba})_3 \cdot \text{CHCl}_3$ :0.050 M in THF, 12 mL, 0.60 mmol, 10 mol%) was added in one portion. To this, 4-iodobenzotrifluoride (6.0 mL, 42 mmol, 8.0 equiv) was added dropwise over 10 min and the solution was stirred for 15 h at room temperature. Then the reaction mixture was quenched with aq. HCl. Then resulting mixture

was extracted with EtOAc two times. The organic extracts were washed with water, brine, dried over  $\text{MgSO}_4$ , and concentrated. The residue was then purified by silica gel chromatography (eluent *n*-hexane/EtOAc 10:0 to 10:3.5 with slow gradient). The first crop crystal of **2b'** (1.01 g, white crystal) was obtained by recrystallization from *n*-hexane/EtOAc. The filtrate was purified by GPC. The second crop solid of **2b'** (0.11 g) was obtained by washing with *n*-hexane. **2b'** (1.12 g, 2.8 mmol, 56%) was obtained in total.  $^1\text{H}$  NMR (600 MHz,  $\text{CD}_3\text{CN}$ )  $\delta$  7.69 (d,  $J$  = 7.9 Hz, 2H), 7.35 (d,  $J$  = 7.9 Hz, 2H), 4.56–4.60 (m, 2H), 4.26–4.30 (m, 3H), 3.15 (sep,  $J$  = 6.9 Hz, 1H), 2.99 (sep,  $J$  = 6.5 Hz, 1H), 1.20 (d,  $J$  = 6.9 Hz, 6H), 0.61 (d,  $J$  = 6.5 Hz, 6H) ppm.  $^{13}\text{C}$  NMR (151 MHz,  $\text{CDCl}_3$ )  $\delta$  169.7, 168.3, 143.1, 129.3 (q,  $J$  = 33.3 Hz), 126.0, 125.6 (d,  $J$  = 4.3 Hz), 124.2 (q,  $J$  = 271.8 Hz), 62.6, 59.4, 55.4, 50.4, 48.8, 48.7, 46.6, 46.2, 46.1, 43.6, 21.1, 20.8, 20.7, 20.5 ppm. HR-MS (ESI-MS, positive) :  $m/z$  = 423.1651 calcd for  $\text{C}_{23}\text{H}_{23}\text{N}_2\text{NaOF}_3$  : 423.1655  $[\text{M} + \text{Na}]^+$ .

#### Synthesis of diarylcubane **3a** (General Procedure 3)

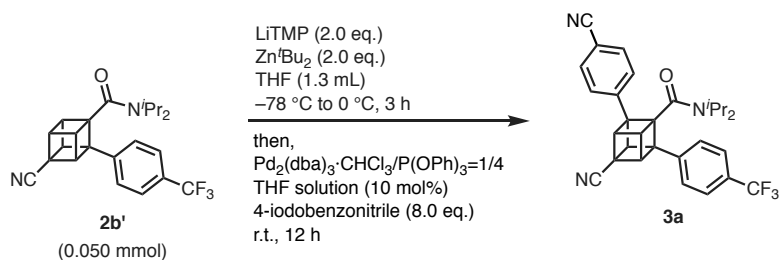

A 20-mL Schlenk tube equipped with J. Young® O-ring tap containing a magnetic stirring bar was charged with **2b'** (20.0 mg, 0.050 mmol) and THF (700  $\mu\text{L}$ ) under  $\text{N}_2$  atmosphere. To the mixture,  $\text{TMPZn'Bu}_2\text{Li}$  solution (0.17 M in THF, 600  $\mu\text{L}$ , 0.10 mmol, 2.0 equiv) was added at  $-78\text{ }^\circ\text{C}$  and the reaction mixture was stirred at  $0\text{ }^\circ\text{C}$  for 3 h.  $\text{Pd}_2(\text{dba})_3\cdot\text{CHCl}_3/\text{P(OPh)}_3$  solution ( $\text{Pd}_2(\text{dba})_3\cdot\text{CHCl}_3$ :0.050 M in THF) was prepared from  $\text{Pd}_2(\text{dba})_3\cdot\text{CHCl}_3$  (51.8 mg, 0.050 mmol), triphenyl phosphite (105  $\mu\text{L}$ , 0.40 mmol) and THF (1.0 mL). To the reaction mixture,  $\text{Pd}_2(\text{dba})_3\cdot\text{CHCl}_3/\text{P(OPh)}_3$  solution ( $\text{Pd}_2(\text{dba})_3\cdot\text{CHCl}_3$ :0.050 M in THF, 100  $\mu\text{L}$ , 5.0  $\mu\text{mol}$ , 10 mol%) and 4-iodobenzonitrile (91.6 mg, 0.40 mmol, 8.0 equiv) were added and the solution was stirred for 12 h at room temperature. Then the reaction mixture was quenched with aq.  $\text{NH}_4\text{Cl}$ . Then resulting mixture was extracted with  $\text{CHCl}_3$  three times. The organic extracts were dried over  $\text{Na}_2\text{SO}_4$ , and concentrated. The residue was then purified by silica gel chromatography ( $\text{EtOAc}/\text{CHCl}_3$  = 1/10) and then GPC. **3a** (18.4 mg, 0.037 mmol, 73%) was obtained as a white solid.  $^1\text{H}$  NMR (600 MHz,  $\text{CDCl}_3$ )  $\delta$  7.71 (d,  $J$  = 8.6 Hz, 2H), 7.67 (d,  $J$  = 7.9 Hz, 2H), 7.33–7.36 (m, 4H), 5.02–5.05 (m, 1H), 4.61 (td,  $J$  = 5.5, 0.7 Hz, 1H), 4.44–4.48 (m, 2H), 2.99 (sep,  $J$  = 6.5 Hz, 1H), 2.68 (sep,  $J$  = 6.5 Hz, 1H), 1.17–1.22 (m, 6H), 0.12 (d,  $J$  = 6.2 Hz, 3H), 0.07 (d,  $J$  = 6.2 Hz, 3H) ppm.  $^{13}\text{C}$  NMR (151 MHz,  $\text{CDCl}_3$ )  $\delta$  165.0, 142.5,

141.1, 132.8, 130.3 (q,  $J = 33.3$  Hz), 126.7, 126.1 (d,  $J = 5.8$  Hz), 124.0 (q,  $J = 273.2$  Hz), 118.5, 117.7, 111.7, 67.9, 59.2, 59.0, 52.8, 52.6, 51.4, 49.2, 46.2, 42.5, 34.1, 20.6, 20.5, 20.3 ppm. HR-MS (ESI-MS, positive) :  $m/z = 524.1919$  calcd for  $C_{30}H_{26}N_3NaOF_3$  : 524.1920  $[M + Na]^+$ .

### Diarylcubane **3b**

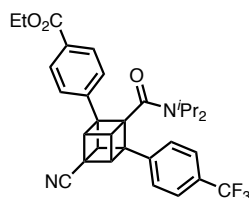

**3b** was prepared according to General Procedure 3 with **2b'** (60.1 mg, 0.15 mmol) and ethyl 4-iodobenzoate (200  $\mu$ L, 1.2 mmol) as a pale orange solid (the reaction time for cross coupling : 18 h). Purification by silica gel chromatography (EtOAc/ $CHCl_3 = 1/10$ ) and then GPC. **3b** (22.3 mg, 0.041 mmol, 27%) was obtained by recrystallization from *n*-hexane.  $^1H$  NMR (600 MHz,  $CD_2Cl_2$ )  $\delta$  8.06 (d,  $J = 8.2$  Hz, 2H), 7.68 (d,  $J = 8.2$  Hz, 2H), 7.39 (d,  $J = 8.2$  Hz, 2H), 7.32 (d,  $J = 8.6$  Hz, 2H), 4.98–5.00 (m, 1H), 4.48–4.54 (m, 3H), 4.35 (q,  $J = 7.1$  Hz, 2H), 2.96 (sep,  $J = 6.9$  Hz, 1H), 2.74 (sep,  $J = 6.5$  Hz, 1H), 1.38 (t,  $J = 7.2$  Hz, 3H), 1.12–1.19 (m, 6H), 0.18 (d,  $J = 6.2$  Hz, 3H), 0.12 (d,  $J = 6.5$  Hz, 3H) ppm.  $^{13}C$  NMR (151 MHz,  $CDCl_3$ )  $\delta$  166.2, 165.3, 142.1, 141.4, 130.4, 130.2 (q,  $J = 33.3$  Hz), 130.0, 126.2, 126.1 (d,  $J = 2.9$  Hz), 125.7, 124.0 (q,  $J = 273.2$  Hz), 118.0, 68.0, 61.4, 59.5, 59.2, 53.2, 50.6, 49.4, 46.1, 41.9, 34.0, 20.6, 20.3, 20.3, 14.5 ppm. HR-MS (ESI-MS, positive) :  $m/z = 549.2357$  calcd for  $C_{32}H_{32}N_2O_3F_3$  : 549.2360  $[M + H]^+$ .

### Diarylcubane **3c**

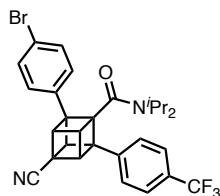

**3c** was prepared according to General Procedure 3 with **2b'** (80.1 mg, 0.20 mmol) and 1-bromo-4-iodobenzene (452.7 mg, 1.6 mmol) as a white solid (the reaction time for cross coupling : 24 h). Purification by silica gel chromatography (EtOAc/ $CHCl_3 = 1/10$ ) and then GPC. **3c** (17.8 mg, 0.032 mmol, 16%) was obtained by recrystallization from *n*-hexane/THF.  $^1H$  NMR (600 MHz,  $CDCl_3$ )  $\delta$  7.66 (d,  $J = 7.9$  Hz, 2H), 7.54 (d,  $J = 8.6$  Hz, 2H), 7.34 (d,  $J = 8.2$  Hz, 2H), 7.10 (d,  $J = 8.2$  Hz, 2H), 5.04–5.06 (m, 1H), 4.61 (t,  $J = 5.5$  Hz, 1H), 4.35–4.39 (m, 2H), 2.96 (sep,  $J = 6.5$  Hz, 1H), 2.65 (sep,  $J = 6.5$  Hz, 1H), 1.19–1.24 (m, 6H), 0.07 (d,  $J = 6.5$  Hz, 3H),  $-0.03$  (d,  $J = 6.5$  Hz, 3H) ppm.  $^{13}C$  NMR (151 MHz,  $CDCl_3$ )  $\delta$  165.4, 141.5,

136.4, 132.3, 130.1 (q,  $J = 31.8$  Hz), 127.5, 126.2, 126.1 (d,  $J = 2.9$  Hz), 124.0 (q,  $J = 273.3$  Hz), 121.9, 118.0, 67.8, 59.3, 59.1, 53.1, 53.0, 50.6, 49.4, 46.1, 41.9, 33.9, 20.6, 20.4, 20.3 ppm. HR-MS (ESI-MS, positive) :  $m/z = 555.1257$  calcd for  $C_{29}H_{27}N_2OBrF_3$  : 555.1253  $[M + H]^+$ .

### Diarylcubane **3d**

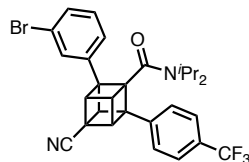

**3d** was prepared according to General Procedure 3 with **2b'** (60.1 mg, 0.15 mmol) and 1-bromo-3-iodobenzene (152  $\mu$ L, 1.2 mmol) as a white solid. Purification by silica gel chromatography (EtOAc/ $CHCl_3 = 1/10$ ) and then PTLC (EtOAc/Toluene = 1/8). **3d** (20.7 mg, 0.037 mmol, 24.8%) was obtained by recrystallization from *n*-hexane/THF.  $^1H$  NMR (600 MHz,  $CD_2Cl_2$ )  $\delta$  7.68 (d,  $J = 8.2$  Hz, 2H), 7.42–7.45 (m, 1H), 7.36–7.40 (m, 3H), 7.30 (t,  $J = 7.9$  Hz, 1H), 7.19 (d,  $J = 7.6$  Hz, 1H), 4.97 (t,  $J = 2.6$  Hz, 1H), 4.45–4.52 (m, 3H), 2.97 (sep,  $J = 6.5$  Hz, 1H), 2.72 (sep,  $J = 6.5$  Hz, 1H), 1.15–1.20 (m, 6H), 0.21 (d,  $J = 6.5$  Hz, 3H), 0.11 (d,  $J = 6.5$  Hz, 3H) ppm.  $^{13}C$  NMR (151 MHz,  $CDCl_3$ )  $\delta$  165.3, 141.5, 139.7, 131.1, 130.8, 130.2 (q,  $J = 33.3$  Hz), 128.8, 126.2, 126.1 (d,  $J = 2.9$  Hz), 124.3, 124.0 (q,  $J = 271.8$  Hz), 123.5, 117.9, 67.9, 59.2, 59.1, 53.3, 53.2, 50.4, 49.6, 46.2, 41.8, 34.0, 20.5, 20.3, 20.3 ppm. HR-MS (ESI-MS, positive) :  $m/z = 555.1255$  calcd for  $C_{29}H_{27}N_2OBrF_3$  : 555.1253  $[M + H]^+$ .

### Diarylcubane **3e**

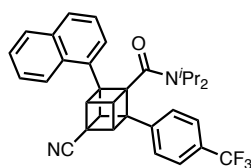

**3e** was prepared according to General Procedure 3 with **2b'** (80.1 mg, 0.20 mmol) and 1-iodonaphthalene (234  $\mu$ L, 1.6 mmol) as a white solid (the reaction time for cross coupling : 24 h). Purification by silica gel chromatography (EtOAc/ $CHCl_3 = 1/10$ ) and then GPC. **3e** (28.0 mg, 0.053 mmol, 27%) was obtained by recrystallization from *n*-hexane/THF in two crops.  $^1H$  NMR (600 MHz,  $CDCl_3$ )  $\delta$  7.87 (d,  $J = 7.6$  Hz, 1H), 7.79 (d,  $J = 8.2$  Hz, 1H), 7.66 (d,  $J = 8.2$  Hz, 2H), 7.48–7.57 (m, 4H), 7.41 (d,  $J = 8.2$  Hz, 2H), 7.34 (d,  $J = 6.9$  Hz, 1H), 5.36 (s, 1H), 4.95 (t,  $J = 5.5$  Hz, 1H), 4.52–4.55 (m, 1H), 4.38–4.41 (m, 1H), 2.60–2.71 (m, 2H), 1.11 (d,  $J = 6.9$  Hz, 3H), 0.74 (d,  $J = 6.9$  Hz, 3H), –0.27 (d,  $J = 6.2$  Hz, 3H), –0.59 (d,  $J = 6.9$  Hz, 3H) ppm.  $^{13}C$  NMR (151 MHz,  $CDCl_3$ )  $\delta$  166.1, 141.5, 134.1, 133.8, 131.1, 130.2 (q,  $J = 33.3$  Hz),

129.1, 129.0, 127.0, 126.6, 126.3, 126.0 (d,  $J = 2.9$  Hz), 125.3, 124.6, 124.1 (q,  $J = 273.2$  Hz), 124.0, 118.3, 69.1, 61.8, 58.5, 53.2, 53.0, 49.7, 48.9, 45.8, 41.0, 34.3, 20.3, 20.1, 19.4 ppm. HR-MS (ESI-MS, positive) :  $m/z = 527.2302$  calcd for  $C_{33}H_{30}N_2OF_3$  : 527.2305  $[M + H]^+$ .

### Diarylcubane **3f**

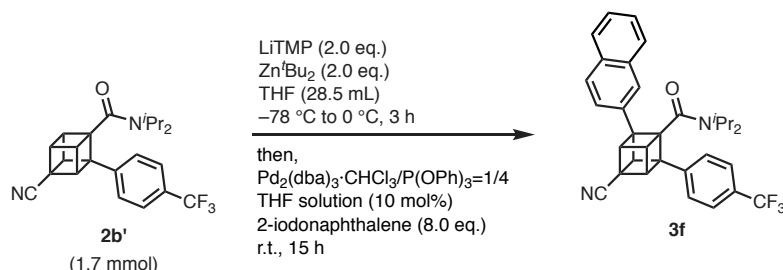

A 200-mL Schlenk tube equipped with J. Young® O-ring tap containing a magnetic stirring bar was charged with **2b'** (680.8 mg, 1.7 mmol) and THF (8.5 mL) under N<sub>2</sub> atmosphere. To the mixture, TMPZn<sup>*i*</sup>Bu<sub>2</sub>Li solution (0.17 M in THF, 20 mL, 3.4 mmol, 2.0 equiv) was added at -78 °C and the reaction mixture was stirred at 0 °C for 3 h. Pd<sub>2</sub>(dba)<sub>3</sub>·CHCl<sub>3</sub>/P(OPh)<sub>3</sub> solution (Pd<sub>2</sub>(dba)<sub>3</sub>·CHCl<sub>3</sub>:0.050 M in THF) was prepared from Pd<sub>2</sub>(dba)<sub>3</sub>·CHCl<sub>3</sub> (207.2 mg, 0.20 mmol), triphenyl phosphite (420 μL, 1.6 mmol) and THF (4.0 mL). To the reaction mixture, Pd<sub>2</sub>(dba)<sub>3</sub>·CHCl<sub>3</sub>/P(OPh)<sub>3</sub> solution (Pd<sub>2</sub>(dba)<sub>3</sub>·CHCl<sub>3</sub>:0.050 M in THF, 3.4 mL, 0.17 mmol, 10 mol%) and 2-iodonaphthalene (3.4 M in THF, 4.0 mL, 13.6 mmol, 8.0 equiv) were added and the solution was stirred for 15 h at room temperature. Then the reaction mixture was quenched with 0.5 N aq. HCl. Then resulting mixture was extracted with EtOAc three times. The organic extracts was washed with H<sub>2</sub>O and brine, dried over Na<sub>2</sub>SO<sub>4</sub>, filtered and concentrated. The residue was then purified by silica gel chromatography (eluent EtOAc/*n*-hexane 0:100 to 25:75 with slow gradient). Crystallization from *n*-hexane/EtOAc afforded 473 mg of white crystals. The residue from the mother liquor was flash chromatographed (eluent EtOAc/*n*-hexane 0:100 to 40:60 with slow gradient) and concentrated. The residue was then filtered on a pad of activated carbon using *n*-hexane/EtOAc 1:1 as eluent. The filtrate was concentrated in vacuo and recrystallized from *n*-hexane/<sup>*i*</sup>PrOH to give another 98 mg, total 571 mg (64 %). <sup>1</sup>H NMR (600 MHz, CDCl<sub>3</sub>) δ 7.87 (d,  $J = 8.2$  Hz, 1H), 7.81–7.86 (m, 2H), 7.67 (d,  $J = 8.2$  Hz, 2H), 7.64 (s, 1H), 7.48–7.54 (m, 2H), 7.40 (d,  $J = 8.2$  Hz, 2H), 7.32 (dd,  $J = 8.6, 1.7$  Hz, 1H), 5.24 (t,  $J = 2.6$  Hz, 1H), 4.68 (t,  $J = 5.5$  Hz, 1H), 4.42–4.46 (m, 1H), 4.38–4.41 (m, 1H), 2.88 (sep,  $J = 6.5$  Hz, 1H), 2.72 (sep,  $J = 6.5$  Hz, 1H), 1.18–1.23c (m, 6H), -0.16 (d,  $J = 6.5$  Hz, 3H), -0.22 (d,  $J = 6.5$  Hz, 3H) ppm. <sup>13</sup>C NMR (151 MHz, CDCl<sub>3</sub>) δ 165.8, 141.8, 134.8, 133.4, 132.8, 130.1 (q,  $J = 33.3$  Hz), 129.3, 128.0, 127.9, 127.0, 126.6, 126.3, 126.0 (d,  $J = 2.9$  Hz), 124.3, 124.1 (q,  $J = 271.8$  Hz), 123.5, 118.2, 68.0, 60.2, 59.2,

53.5, 53.2, 50.2, 49.5, 46.0, 41.7, 33.9, 20.5, 20.3, 20.3, 20.2 ppm. HR-MS (ESI-MS, positive) :  $m/z = 527.2304$  calcd for  $C_{33}H_{30}N_2OF_3$  : 527.2305  $[M + H]^+$ .

### Diarylcubane **3x**

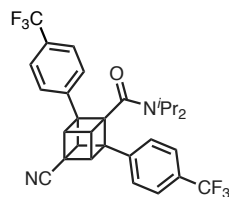

**3x** was prepared according to General Procedure 3 with **2b'** (200.2 mg, 0.50 mmol), THF (2.5 mL) and 4-iodobenzotrifluoride (580  $\mu$ L, 4.0 mmol) as a pale yellow solid (the reaction time for cross coupling : 15 h). Purification by silica gel chromatography (eluent  $CHCl_3/EtOAc$  10:0 to 10:1 with slow gradient). **3x** (156.1 mg, 0.29 mmol, 57%) was obtained by recrystallization from *n*-hexane/THF.  $^1H$  NMR (600 MHz,  $CDCl_3$ )  $\delta$  7.67 (d,  $J = 8.2$  Hz, 4H), 7.35 (d,  $J = 8.2$  Hz, 4H), 5.08–5.10 (m, 1H), 4.63 (t,  $J = 5.5$  Hz, 1H), 4.41–4.43 (m, 2H), 2.96 (sep,  $J = 6.9$  Hz, 1H), 2.66 (sep,  $J = 6.2$  Hz, 1H), 1.21 (d,  $J = 6.2$  Hz, 6H), 0.02 (d,  $J = 6.9$  Hz, 6H) ppm.  $^{13}C$  NMR (151 MHz,  $CDCl_3$ )  $\delta$  165.3, 141.3, 130.2 (q,  $J = 33.3$  Hz), 126.2, 126.1 (d,  $J = 2.9$  Hz), 124.0 (q,  $J = 271.8$  Hz), 117.8, 67.9, 59.2, 53.0, 50.9, 49.3, 46.2, 42.2, 34.1, 20.4, 20.3 ppm. HR-MS (ESI-MS, positive) :  $m/z = 567.1844$  calcd for  $C_{30}H_{26}N_2NaOF_6$  : 567.1842  $[M + Na]^+$ .

### Synthesis of triarylcubane **4a** (General Procedure 4)

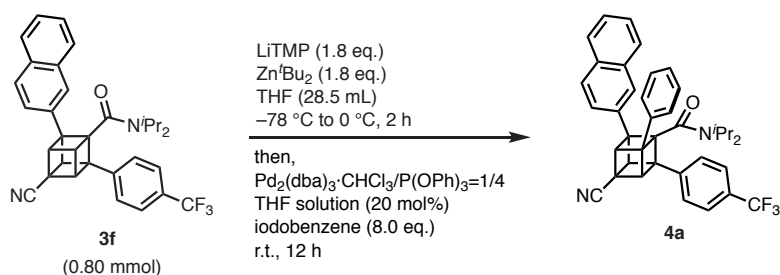

A 100-mL Schlenk tube equipped with J. Young® O-ring tap containing a magnetic stirring bar was charged with **3f** (421.3 mg, 0.80 mmol) and THF (4.0 mL) under  $N_2$  atmosphere. To the mixture,  $TMPZn^iBu_2Li$  solution (0.17 M in THF, 8.5 mL, 1.44 mmol, 1.8 equiv) was added at  $-78$  °C and the reaction mixture was stirred at  $0$  °C for 2 h.  $Pd_2(dba)_3 \cdot CHCl_3/P(OPh)_3$  solution ( $Pd_2(dba)_3 \cdot CHCl_3$ :0.050 M in THF) was prepared from  $Pd_2(dba)_3 \cdot CHCl_3$  (207.2 mg, 0.20 mmol), triphenyl phosphite (420  $\mu$ L, 1.6 mmol) and THF (4.0 mL). To the reaction mixture,  $Pd_2(dba)_3 \cdot CHCl_3/P(OPh)_3$  solution ( $Pd_2(dba)_3 \cdot CHCl_3$ :0.050 M in THF, 3.2 mL, 0.16 mmol, 20 mol%) and iodobenzene (715  $\mu$ L, 6.4 mmol, 8.0 equiv) were added and the solution was stirred for 12 h at room temperature. Then the reaction mixture was

quenched with aq.  $\text{NH}_4\text{Cl}$ . Then resulting mixture was extracted with  $\text{CHCl}_3$  three times. The organic extracts were dried over  $\text{Na}_2\text{SO}_4$ , and concentrated. The residue was then purified by silica gel chromatography ( $\text{CHCl}_3$  only) and then PTLC ( $\text{CH}_2\text{Cl}_2$  only). **4a** (136.4 mg, 0.23 mmol, 28%) was obtained as a white solid by recrystallization from  $\text{CS}_2$ .  $^1\text{H}$  NMR (600 MHz,  $\text{CDCl}_3$ )  $\delta$  7.92 (d,  $J$  = 8.2 Hz, 1H), 7.86 (dd,  $J$  = 12.0, 7.9 Hz, 2H), 7.73 (d,  $J$  = 7.9 Hz, 2H), 7.70 (s, 1H), 7.42–7.57 (m, 7H), 7.31–7.39 (m, 3H), 5.07 (t,  $J$  = 2.6 Hz, 1H), 4.69 (td,  $J$  = 3.0, 2.3 Hz, 2H), 2.79 (sep,  $J$  = 6.5 Hz, 1H), 2.71 (sep,  $J$  = 6.2 Hz, 1H), 1.05–1.11 (m, 6H),  $-0.28$  (d,  $J$  = 6.5 Hz, 3H),  $-0.36$  (d,  $J$  = 6.2 Hz, 3H) ppm.  $^{13}\text{C}$  NMR (151 MHz,  $\text{CDCl}_3$ )  $\delta$  164.9, 142.4, 137.9, 135.2, 133.5, 132.8, 129.5 (q,  $J$  = 31.8 Hz), 129.3, 128.1, 128.0, 128.0, 126.9, 126.8, 126.5, 125.8, 125.8 (d,  $J$  = 2.9 Hz), 124.5, 124.3 (q,  $J$  = 271.8 Hz), 123.8, 118.1, 72.4, 57.4, 57.4, 56.0, 56.0, 55.9, 52.7, 49.0, 45.8, 30.9, 20.5, 20.4, 20.11, 20.08 ppm. HR-MS (ESI-MS, positive) :  $m/z$  = 625.2447 calcd for  $\text{C}_{39}\text{H}_{33}\text{N}_2\text{NaOF}_3$  : 625.2437  $[\text{M} + \text{Na}]^+$ .

#### Triarylcubane **4b**

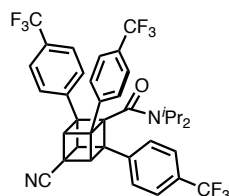

**4b** was prepared according to General Procedure 4 with **3x** (136.1 mg, 0.25 mmol) and 4-iodobenzotrifluoride (290  $\mu\text{L}$ , 2.0 mmol) as a white solid (TMPZn $^t$ Bu $_2$ Li : 2.0 equiv). Purification by silica gel chromatography (eluent  $\text{CHCl}_3$ / *n*-hexane 1:1 to 1:0 with slow gradient) and then PTLC (EtOAc/ $\text{CS}_2$  = 1/10). **4b** (71.6 mg, 0.10 mmol, 42%) was obtained by recrystallization from  $\text{CS}_2$ .  $^1\text{H}$  NMR (600 MHz,  $\text{CDCl}_3$ )  $\delta$  7.73 (d,  $J$  = 7.9 Hz, 6H), 7.44 (d,  $J$  = 7.9 Hz, 6H), 4.80 (s, 3H), 2.85 (sep,  $J$  = 6.9 Hz, 1H), 2.58 (sep,  $J$  = 6.5 Hz, 1H), 1.08 (d,  $J$  = 6.9 Hz, 6H),  $-0.21$  (d,  $J$  = 6.5 Hz, 6H) ppm.  $^{13}\text{C}$  NMR (151 MHz,  $\text{CDCl}_3$ )  $\delta$  164.1, 141.4, 130.3 (q,  $J$  = 33.3 Hz), 126.4, 126.2 (d,  $J$  = 4.3 Hz), 124.0 (q,  $J$  = 272.0 Hz), 117.3, 72.2, 56.7, 54.8, 48.9, 46.1, 31.2, 20.3, 20.1 ppm. HR-MS (ESI-MS, positive) :  $m/z$  = 689.2210 calcd for  $\text{C}_{37}\text{H}_{30}\text{N}_2\text{OF}_9$  : 689.2009  $[\text{M} + \text{H}]^+$ .

#### Triarylcubane **4c**

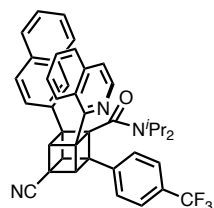

**4c** was prepared according to General Procedure 4 with **3f** (105.3 mg, 0.20 mmol), THF (2.4 mL) and 1-iodoisoquinoline (408.1 mg, 1.6 mmol) as a white solid (TMPZn $^t$ Bu $_2$ Li : 2.0 equiv,

the reaction time for orthometalation : 2.5 h). Purification by silica gel chromatography (EtOAc/CHCl<sub>3</sub> = 1/10) and then PTLC (EtOAc/toluene = 1/12). **4c** (6.3 mg, 9.6 μmol, 5%) was obtained by recrystallization from *n*-hexane/MeTHF. <sup>1</sup>H NMR (600 MHz, CDCl<sub>3</sub>) δ 8.58 (d, *J* = 5.5 Hz, 1H), 7.96–8.01 (m, 2H), 7.86–7.93 (m, 4H), 7.79 (d, *J* = 7.9 Hz, 2H), 7.67–7.72 (m, 3H), 7.62 (d, *J* = 5.5 Hz, 1H), 7.60 (dd, *J* = 8.4, 1.5 Hz, 1H), 7.50–7.57 (m, 3H), 5.62 (t, *J* = 2.4 Hz, 1H), 5.21 (t, *J* = 2.6 Hz, 1H), 4.53 (t, *J* = 2.7 Hz, 1H), 2.83 (sep, *J* = 6.5 Hz, 1H), 2.58 (sep, *J* = 6.9 Hz, 1H), 0.87 (d, *J* = 6.9 Hz, 3H), 0.70 (d, *J* = 6.5 Hz, 3H), –0.48 – –0.54 (m, 6H) ppm. <sup>13</sup>C NMR (151 MHz, CDCl<sub>3</sub>) δ 165.6, 156.5, 142.5, 142.2, 136.4, 135.2, 133.5, 132.9, 130.8, 129.7 (q, *J* = 33.3 Hz), 129.1, 128.1, 128.0, 127.9, 127.8, 127.4, 126.9, 126.6, 126.5, 125.9 (d, *J* = 2.9 Hz), 125.3, 125.1, 124.3 (q, *J* = 271.8 Hz), 124.3, 120.9, 118.0, 73.6, 59.2, 58.3, 58.0, 56.8, 53.6, 51.4, 49.0, 45.7, 32.1, 20.3, 20.2, 19.7, 19.6 ppm. HR-MS (ESI-MS, positive) : *m/z* = 654.2725 calcd for C<sub>42</sub>H<sub>35</sub>N<sub>3</sub>OF<sub>3</sub> : 654.2727 [M + H]<sup>+</sup>.

## 7. Transformation of Multiply Arylated Cubanes [S8], [S9]

### 6-1. Decarboxylation of triarylcubane **4a**

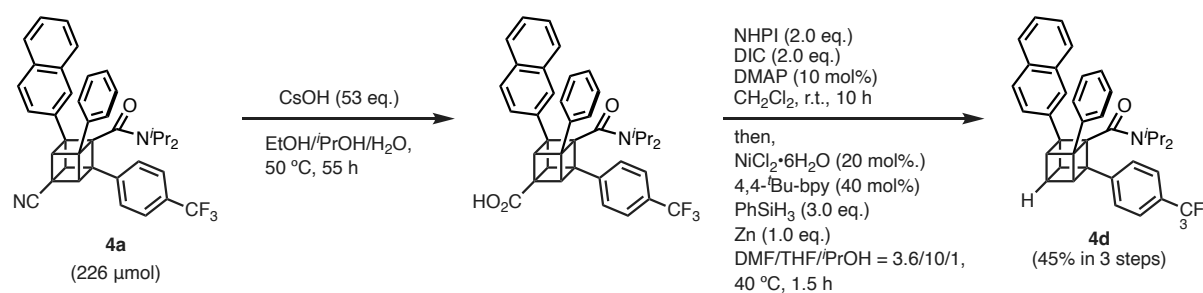

A culture tube was containing a magnetic stirring bar was charged with **4a** (136.4 mg, 0.23 mmol), EtOH (1.1 mL) and *i*PrOH (4.2 mL). To the mixture, aq. CsOH (5.0 M, 1.2 mL, 6.0 mmol, 26.5 equiv) was added and the reaction mixture was stirred at 50 °C. After 19 h stirring, aq. CsOH (5.0 M, 0.60 mL, 3.0 mmol, 13.3 equiv) was added to the mixture and the reaction mixture was stirred at 50 °C. After 12 h stirring, aq. CsOH (5.0 M, 0.60 mL, 3.0 mmol, 13.3 equiv) and EtOH (0.60 mL) were added to the mixture and the reaction mixture was stirred for 24 h at 50 °C. Then the reaction mixture was quenched with 2.0 M aq. HCl. Then resulting mixture was extracted with CHCl<sub>3</sub> three times. The organic extracts were dried over Na<sub>2</sub>SO<sub>4</sub>, and concentrated. The residue was used as triarylcubane carboxylic acid without further purification.

A 50 mL round-bottom flask containing a magnetic stirring bar was charged with triarylcubane carboxylic acid (101.3 mg, 0.163 mmol), *N*-hydroxyphthalimide (53.2 mg, 0.326 mmol, 2.0 equiv), DMAP (2.0 mg, 16 μmol, 10 mol%) and suspended in 4.0 mL dry DCM under N<sub>2</sub> atmosphere. After addition of *N,N'*-diisopropylcarbodiimide (50 μL, 0.326

mmol, 2.0 equiv), the reaction mixture was stirred for 10 h in the dark at room temperature. The reaction mixture was filtered through celite and the solvent removed in vacuo. The residue was purified by silica gel chromatography (CH<sub>2</sub>Cl<sub>2</sub>). This was used as redox-active ester cubane without further purification.

A 20-mL Schlenk tube equipped with J. Young® O-ring tap containing a magnetic stirring bar was charged with the redox-active ester cubane (0.134 mmol), Zn metal (8.8 mg, 0.134 mmol, 1.0 equiv) under N<sub>2</sub> atmosphere. THF (0.75 mL) and <sup>i</sup>PrOH (75 μL) were added. A solution of NiCl<sub>2</sub>•6H<sub>2</sub>O/4,4'-<sup>t</sup>Bu-bpy (0.10 M in DMF, 0.27 mL, 10 mol% NiCl<sub>2</sub>•6H<sub>2</sub>O, 20 mol% 4,4'-<sup>t</sup>Bu-bpy) and PhSiH<sub>3</sub> (50 μL, 0.402 mmol, 3.0 equiv) were added in quick succession. The reaction mixture was stirred for 1 h at 40 °C. Then, the mixture was quenched with H<sub>2</sub>O, sat. aq. NH<sub>4</sub>Cl. The mixture was extracted with EtOAc, and the organic extracts were dried over Na<sub>2</sub>SO<sub>4</sub>. The organic extracts were concentrated on a rotary evaporator. The residue was then purified by silica gel chromatography (CHCl<sub>3</sub>). **4d** (58.4 mg, 0.10 mmol, 45% in 3 steps) was obtained as a white solid by recrystallization from *n*-hexane/THF.

#### Triarylcubane **4d**

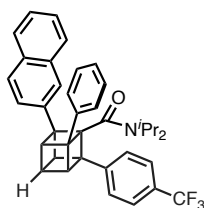

<sup>1</sup>H NMR (600 MHz, CD<sub>3</sub>CN) δ 7.92 (t, *J* = 7.7 Hz, 2H), 7.88 (d, *J* = 7.9 Hz, 1H), 7.82 (s, 1H), 7.73 (d, *J* = 7.9 Hz, 2H), 7.60 (d, *J* = 7.9 Hz, 2H), 7.46–7.54 (m, 3H), 7.38–7.45 (m, 4H), 7.24–7.29 (m, 1H), 4.72–4.75 (m, 1H), 4.44 (dq, *J* = 7.3, 2.2 Hz, 2H), 3.84 (q, *J* = 5.2 Hz, 1H), 2.74–2.83 (m, 2H), 0.95–1.05 (m, 6H), –0.35 (d, *J* = 6.2 Hz, 3H), –0.41 (d, *J* = 6.5 Hz, 3H) ppm. <sup>13</sup>C NMR (151 MHz, CD<sub>3</sub>CN) δ 167.2, 146.8, 141.6, 139.2, 134.5, 133.2, 129.5, 129.1, 128.6, 128.4 (q, *J* = 31.8 Hz), 128.1, 127.5, 127.3, 127.0, 126.7, 125.9 (d, *J* = 4.3 Hz), 125.8, 125.7 (q, *J* = 272.0 Hz), 125.2, 72.5, 59.0, 58.9, 57.7, 54.0, 53.7, 51.1, 49.1, 45.9, 37.3, 20.6, 20.5, 20.51, 20.49 ppm. HR-MS (ESI-MS, positive) : *m/z* = 578.2665 calcd for C<sub>38</sub>H<sub>35</sub>NOF<sub>3</sub> : 578.2665 [M + H]<sup>+</sup>.

## 6-2. Decarboxylative phenylation of diarylcubane **3f**

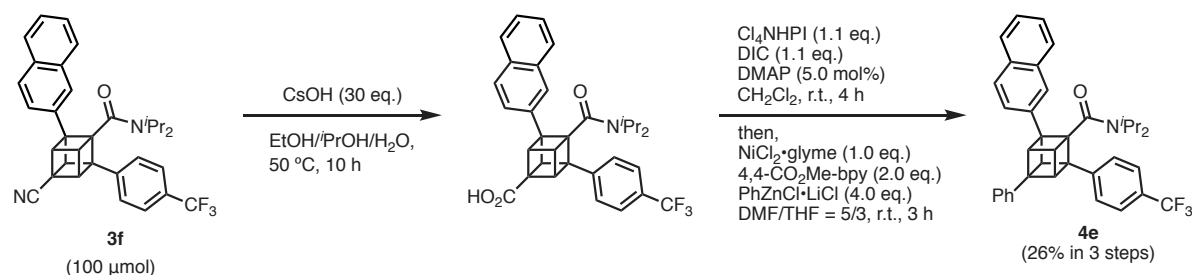

A culture tube was containing a magnetic stirring bar was charged with **3f** (52.7 mg, 0.10 mmol), EtOH (0.60 mL) and *i*PrOH (2.1 mL). To the mixture, aq. CsOH (5.0 M, 0.60 mL, 3.0 mmol, 30 equiv) was added and the reaction mixture was stirred for 10 h at  $50\text{ }^\circ\text{C}$ . Then the reaction mixture was quenched with 2.0 M aq. HCl. Then resulting mixture was extracted with  $\text{CHCl}_3$  three times. The organic extracts were dried over  $\text{Na}_2\text{SO}_4$ , and concentrated. The residue was used as diarylcubane carboxylic acid without further purification.

A 50 mL round-bottom flask was containing a magnetic stirring bar was charged with diarylcubane carboxylic acid (40.8 mg, 0.075 mmol), tetrachlorohydroxyisindoline-1,3-dione (24.7 mg, 0.082 mmol, 1.1 equiv), DMAP (0.47 mg, 3.7  $\mu\text{mol}$ , 5 mol%) and suspended in 2.0 mL dry DCM under  $\text{N}_2$  atmosphere. After addition of *N,N'*-diisopropylcarbodiimide (12.8  $\mu\text{L}$ , 0.082 mmol, 1.1 equiv), the reaction mixture was stirred for 4 h in the dark at room temperature. The reaction mixture was filtered through celite and the solvent removed in vacuo. The residue was used as redox-active ester cubane without further purification due to sensibility to moisture and  $\text{SiO}_2$ .

A 20-mL Schlenk tube equipped with J. Young® O-ring tap containing a magnetic stirring bar was charged with the redox-active ester cubane (0.075 mmol),  $\text{NiCl}_2\cdot\text{glyme}$  (16.4 mg, 0.075 mmol, 1.0 equiv) and 4,4'-Dimethoxycarbonyl-2,2'-bipyridine (40.7 mg, 0.15 mmol, 2.0 equiv) under  $\text{N}_2$  atmosphere. Finally, the yellow solids were dissolved in DMF (1.0 mL) and stirred under  $\text{N}_2$  atmosphere.  $\text{PhZnCl}\cdot\text{LiCl}$  solution (0.50 M in THF) was prepared from LiCl (42.4 mg),  $\text{PhMgBr}$  solution (3.0 M in  $\text{Et}_2\text{O}$ , 0.35 mL), THF (0.65 mL) and  $\text{ZnCl}_2$  solution (1.0 M in THF, 1.0 mL). Then the  $\text{PhZnCl}\cdot\text{LiCl}$  solution (600  $\mu\text{L}$ , 0.050 M, 0.30 mmol, 4.0 equiv) was added in one portion and the mixture was stirred for 3 h at room temperature. The reaction mixture was quenched with 2.0 M aq. HCl. Then resulting mixture was extracted with  $\text{CHCl}_3$  three times. The organic extracts were dried over  $\text{Na}_2\text{SO}_4$ , and concentrated. The residue was then purified by silica gel chromatography ( $\text{CHCl}_3$ ). **4e** (14.9 mg, 26  $\mu\text{mol}$ , 26% in 3 steps) was obtained as a white solid by recrystallization from *n*-hexane.

### Triarylcubane **4e**

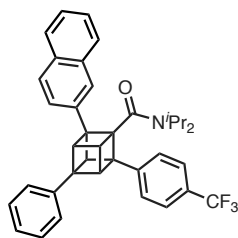

$^1\text{H}$  NMR (600 MHz, cyclohexane- $d_{12}$ )  $\delta$  7.73 (d,  $J$  = 8.2 Hz, 1H), 7.69 (dd,  $J$  = 12.4, 8.2 Hz, 2H), 7.59 (s, 1H), 7.55 (d,  $J$  = 7.6 Hz, 2H), 7.29–7.40 (m, 5H), 7.20 (t,  $J$  = 7.9 Hz, 2H), 7.10–7.13 (m, 2H), 7.05–7.09 (m, 1H), 4.84 (s, 1H), 4.53 (t,  $J$  = 5.5 Hz, 1H), 4.17–4.20 (m, 1H), 4.10–4.13 (m, 1H), 2.94 (sep,  $J$  = 6.2 Hz, 1H), 2.83 (sep,  $J$  = 6.8 Hz, 1H), 1.21–1.32 (m, 6H), –0.19–0.07 (m, 6H) ppm.  $^{13}\text{C}$  NMR (151 MHz, cyclohexane- $d_{12}$ )  $\delta$  166.6, 145.3, 142.0, 138.2, 134.6, 133.5, 130.2 (q,  $J$  = 31.8 Hz), 129.2, 129.0, 128.3, 128.1, 126.8, 126.8, 126.7, 126.1, 126.0 (d,  $J$  = 2.9 Hz), 125.5, 124.9 (q,  $J$  = 271.8 Hz), 124.8, 124.3, 68.8, 58.4, 57.4, 55.3, 54.7, 54.0, 53.0, 49.2, 46.4, 40.3, 21.0, 20.7, 20.6, 20.5 ppm. HR-MS (ESI-MS, positive) :  $m/z$  = 578.2663 calcd for  $\text{C}_{38}\text{H}_{35}\text{NOF}_3$  : 578.2665  $[\text{M} + \text{H}]^+$ .

### 6-3. Decarboxylative coupling of triarylcubane **4b**

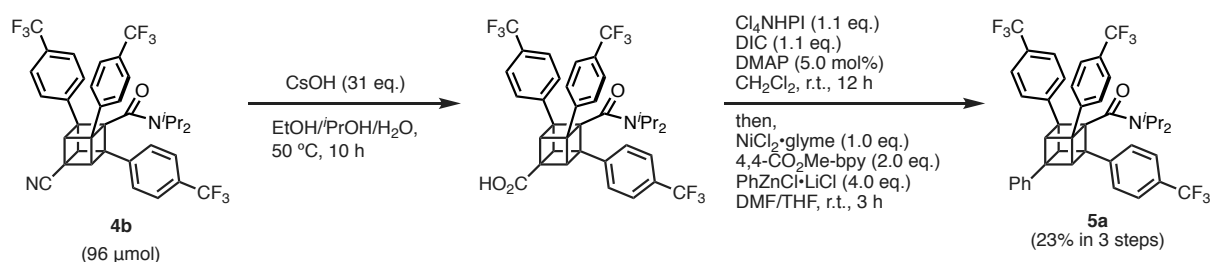

A culture tube was containing a magnetic stirring bar was charged with **4b** (66.3 mg, 0.096 mmol), EtOH (2.1 mL) and  $i$ PrOH (1.0 mL). To the mixture, aq. CsOH (5.0 M, 0.60 mL, 3.0 mmol, 31 equiv) was added and the reaction mixture was stirred for 10 h at 50 °C. Then the reaction mixture was quenched with 2.0 M aq. HCl. Then resulting mixture was extracted with  $\text{CHCl}_3$  three times. The organic extracts were dried over  $\text{Na}_2\text{SO}_4$ , and concentrated. The residue was used as triarylcubane carboxylic acid without further purification.

A 50 mL round-bottom flask was containing a magnetic stirring bar was charged with triarylcubane carboxylic acid (61.73 mg, 0.087 mmol), tetrachlorohydroxyisoindoline-1,3-dione (28.9 mg, 0.096 mmol, 1.1 equiv), DMAP (0.53 mg, 4.4  $\mu\text{mol}$ , 5.0 mol%) and suspended in 2.0 mL dry DCM under  $\text{N}_2$  atmosphere. After addition of  $N,N'$ -diisopropylcarbodiimide (15  $\mu\text{L}$ , 0.096 mmol, 1.1 equiv), the reaction mixture was stirred for 12 h in the dark at room temperature. The reaction mixture was filtered through celite and the

solvent removed in vacuo. The residue was used as redox-active ester cubane without further purification due to sensibility to moisture and SiO<sub>2</sub>.

A 20-mL Schlenk tube equipped with J. Young® O-ring tap containing a magnetic stirring bar was charged with the redox-active ester cubane (0.087 mmol), NiCl<sub>2</sub>-glyme (19.2 mg, 0.087 mmol, 1.0 equiv) and 4,4'-Dimethoxycarbonyl-2,2'-bipyridine (47.5 mg, 0.174 mmol, 2.0 equiv) under N<sub>2</sub> atmosphere. Finally, the yellow solids were dissolved in DMF (1.0 mL) and stirred under N<sub>2</sub> atmosphere. PhZnCl•LiCl solution (0.50 M in THF) was prepared from LiCl (42.4 mg), PhMgBr solution (3.0 M in Et<sub>2</sub>O, 0.35 mL), THF (0.65 mL) and ZnCl<sub>2</sub> solution (1.0 M in THF, 1.0 mL). Then the PhZnCl•LiCl solution (700 µL, 0.050 M, 0.35 mmol, 4.0 equiv) was added in one portion and the mixture was stirred for 3 h at room temperature. The reaction mixture was quenched with 2.0 M aq. HCl. Then resulting mixture was extracted with CHCl<sub>3</sub> three times. The organic extracts were dried over Na<sub>2</sub>SO<sub>4</sub>, and concentrated. The residue was then purified by silica gel chromatography (CH<sub>2</sub>Cl<sub>2</sub>) and PTLC (CH<sub>2</sub>Cl<sub>2</sub>). **5x** (16.6 mg, 22 µmol, 23% in 3 steps) was obtained as a white solid by recrystallization from CS<sub>2</sub>.

#### Tetraarylcubane **5a**

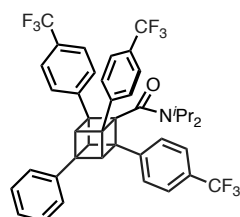

<sup>1</sup>H NMR (600 MHz, CDCl<sub>3</sub>) δ 7.69 (d, *J* = 7.9 Hz, 6H), 7.49 (d, *J* = 7.9 Hz, 6H), 7.34 (t, *J* = 7.7 Hz, 2H), 7.23 (t, *J* = 7.4 Hz, 1H), 7.15 (dd, *J* = 8.4, 1.2 Hz, 2H), 4.59 (s, 3H), 2.89 (sep, *J* = 6.5 Hz, 1H), 2.76 (sep, *J* = 6.5 Hz, 1H), 1.14 (d, *J* = 6.5 Hz, 6H), -0.18 (d, *J* = 6.5 Hz, 6H) ppm. <sup>13</sup>C NMR (151 MHz, CDCl<sub>3</sub>) δ 165.7, 143.8, 140.0, 129.4 (q, *J* = 31.8 Hz), 128.9, 127.1, 126.5, 125.9 (d, *J* = 4.3 Hz), 125.2, 124.3 (q, *J* = 271.8 Hz), 72.3, 56.3, 54.5, 50.0, 48.6, 45.9, 20.5, 20.3 ppm. HR-MS (ESI-MS, positive) : *m/z* = 762.2391 calcd for C<sub>42</sub>H<sub>34</sub>NNaOF<sub>9</sub> : 762.2389 [M + Na]<sup>+</sup>.

## 7. X-ray Crystallographic Analysis

Details of the crystal data and the intensity data collection parameters for **2a**, **2e**, **2f**, **2k**, **2p**, **3a**, **4b** and **5a** are listed in Table S2–4 and Figure S1–8. In each case, a suitable crystal was mounted with mineral oil on a glass fiber and transferred to the goniometer of a Rigaku PILATUS diffractometer. Graphite-monochromated Mo K $\alpha$  radiation ( $\lambda = 0.71073$  Å) was used. Cell parameters were determined and refined, and raw frame data were integrated using CrysAlis<sup>Pro</sup> (Agilent Technologies, 2010). The structures were solved by direct methods with SIR-97,<sup>[S10]</sup> SHELXS,<sup>[S11]</sup> or SHELXT<sup>[S12]</sup> and refined by full-matrix least-squares techniques against  $F^2$  (SHELXL-2016/6 or SHELXL-2018/3)<sup>[S11]</sup> with Yadokari-XG program<sup>[S13]</sup> or Olex2<sup>[S14]</sup> software package. The intensities were corrected for Lorentz and polarization effects. The non-hydrogen atoms were refined anisotropically. Hydrogen atoms were placed using AFIX instructions.

**Table S2.** Crystallographic data and refinement details for **2a**, **2e**, **2f**.

|                                        | <b>2a</b>                                                     | <b>2e</b>                                                     | <b>2f</b>                                                     |
|----------------------------------------|---------------------------------------------------------------|---------------------------------------------------------------|---------------------------------------------------------------|
| CCDC Number                            | 1993519                                                       | 1993515                                                       | 1993518                                                       |
| formula                                | C <sub>29</sub> H <sub>37</sub> N <sub>3</sub> O <sub>2</sub> | C <sub>68</sub> H <sub>84</sub> N <sub>4</sub> O <sub>4</sub> | C <sub>31</sub> H <sub>42</sub> N <sub>2</sub> O <sub>4</sub> |
| fw                                     | 459.61                                                        | 1021.39                                                       | 506.66                                                        |
| $T$ (K)                                | 123(2)                                                        | 123(2)                                                        | 123(2)                                                        |
| $\lambda$ (Å)                          | 0.71073                                                       | 0.71073                                                       | 0.71073                                                       |
| cryst syst                             | Orthorhombic                                                  | Triclinic                                                     | Monoclinic                                                    |
| space group                            | $Pbca$                                                        | $P-1$                                                         | $P2_1/n$                                                      |
| $a$ (Å)                                | 12.4001(8)                                                    | 13.5526(5)                                                    | 12.9747(2)                                                    |
| $b$ (Å)                                | 25.3104(17)                                                   | 14.1690(5)                                                    | 12.3749(2)                                                    |
| $c$ (Å)                                | 16.4161(9)                                                    | 17.1029(5)                                                    | 17.7595(3)                                                    |
| $\alpha$ (deg)                         | 90                                                            | 103.450(3)                                                    | 90                                                            |
| $\beta$ (deg)                          | 90                                                            | 107.340(3)                                                    | 101.9476(17)                                                  |
| $\gamma$ (deg)                         | 90                                                            | 103.234(3)                                                    | 90                                                            |
| $V$ (Å <sup>3</sup> )                  | 5152.2(6)                                                     | 2880.96(18)                                                   | 2789.71(8)                                                    |
| $Z$                                    | 8                                                             | 2                                                             | 4                                                             |
| $D_{\text{calc}}$ (g/cm <sup>3</sup> ) | 1.185                                                         | 1.177                                                         | 1.206                                                         |
| $\mu$ (mm <sup>-1</sup> )              | 0.075                                                         | 0.072                                                         | 0.079                                                         |
| $F(000)$                               | 1984                                                          | 1104                                                          | 1096                                                          |
| cryst size (mm)                        | 0.20 × 0.05 × 0.03                                            | 0.15 × 0.05 × 0.02                                            | 0.20 × 0.20 × 0.10                                            |
| $\theta$ range (deg)                   | 2.481–24.998                                                  | 2.347–24.998                                                  | 2.344–24.996                                                  |
| reflns collected                       | 35337                                                         | 31848                                                         | 29403                                                         |
| indep reflns/ $R_{\text{int}}$         | 4538/0.0930                                                   | 10091/0.0742                                                  | 4911/0.0214                                                   |
| params                                 | 315                                                           | 701                                                           | 343                                                           |
| GOF on $F^2$                           | 1.017                                                         | 1.061                                                         | 1.035                                                         |
| $R_1$ , $wR_2$ [ $I > 2\sigma(I)$ ]    | 0.0484, 0.0932                                                | 0.0768, 0.1775                                                | 0.0343, 0.0866                                                |
| $R_1$ , $wR_2$ (all data)              | 0.0940, 0.1094                                                | 0.1427, 0.2124                                                | 0.0374, 0.0887                                                |

**Table S3.** Crystallographic data and refinement details for **2k**, **2p**, **3a**.

|                                                                              | <b>2k</b>                                                     | <b>2p</b>                                                     | <b>3a</b>                                                       |
|------------------------------------------------------------------------------|---------------------------------------------------------------|---------------------------------------------------------------|-----------------------------------------------------------------|
| CCDC Number                                                                  | 1993517                                                       | 1993513                                                       | 1993512                                                         |
| formula                                                                      | C <sub>32</sub> H <sub>40</sub> N <sub>2</sub> O <sub>2</sub> | C <sub>31</sub> H <sub>39</sub> N <sub>3</sub> O <sub>2</sub> | C <sub>30</sub> H <sub>26</sub> F <sub>3</sub> N <sub>3</sub> O |
| fw                                                                           | 484.66                                                        | 485.65                                                        | 501.54                                                          |
| <i>T</i> (K)                                                                 | 123(2)                                                        | 123(2)                                                        | 123(2)                                                          |
| $\lambda$ (Å)                                                                | 0.71073                                                       | 0.71073                                                       | 0.71073                                                         |
| cryst syst                                                                   | Monoclinic                                                    | Triclinic                                                     | Monoclinic                                                      |
| space group                                                                  | <i>P</i> 2 <sub>1</sub> / <i>n</i>                            | <i>P</i> -1                                                   | <i>P</i> 2 <sub>1</sub> / <i>n</i>                              |
| <i>a</i> (Å)                                                                 | 10.4974(4)                                                    | 8.9740(2)                                                     | 14.0809(7)                                                      |
| <i>b</i> (Å)                                                                 | 24.3000(6)                                                    | 11.7370(3)                                                    | 10.9917(4)                                                      |
| <i>c</i> (Å)                                                                 | 11.3737(4)                                                    | 14.0121(3)                                                    | 17.1659(8)                                                      |
| $\alpha$ (deg)                                                               | 90                                                            | 113.955(2)                                                    | 90                                                              |
| $\beta$ (deg)                                                                | 109.196(4)                                                    | 97.7538(17)                                                   | 108.846(5)                                                      |
| $\gamma$ (deg)                                                               | 90                                                            | 91.349(2)                                                     | 90                                                              |
| <i>V</i> (Å <sup>3</sup> )                                                   | 2739.97(17)                                                   | 1331.40(6)                                                    | 2514.4(2)                                                       |
| <i>Z</i>                                                                     | 4                                                             | 2                                                             | 4                                                               |
| <i>D</i> <sub>calc</sub> (g/cm <sup>3</sup> )                                | 1.175                                                         | 1.211                                                         | 1.325                                                           |
| $\mu$ (mm <sup>-1</sup> )                                                    | 0.073                                                         | 0.076                                                         | 0.097                                                           |
| <i>F</i> (000)                                                               | 1048                                                          | 524                                                           | 1048                                                            |
| cryst size (mm)                                                              | 0.10 × 0.05 × 0.01                                            | 0.25 × 0.20 × 0.10                                            | 0.10 × 0.10 × 0.10                                              |
| $\theta$ range (deg)                                                         | 2.441–24.998                                                  | 2.299–24.999                                                  | 1.634–24.999                                                    |
| reflns collected                                                             | 29817                                                         | 14591                                                         | 13618                                                           |
| indep reflns/ <i>R</i> <sub>int</sub>                                        | 4822/0.0292                                                   | 4665/0.0192                                                   | 4418/0.0510                                                     |
| params                                                                       | 333                                                           | 333                                                           | 375                                                             |
| GOF on <i>F</i> <sup>2</sup>                                                 | 1.026                                                         | 1.028                                                         | 1.106                                                           |
| <i>R</i> <sub>1</sub> , w <i>R</i> <sub>2</sub> [ <i>I</i> > 2σ( <i>I</i> )] | 0.0347, 0.0817                                                | 0.0365, 0.0927                                                | 0.0615, 0.1401                                                  |
| <i>R</i> <sub>1</sub> , w <i>R</i> <sub>2</sub> (all data)                   | 0.0432, 0.0866                                                | 0.0402, 0.0949                                                | 0.0774, 0.1466                                                  |

**Table S4.** Crystallographic data and refinement details for **4b**, **5a**.

|                                                                                       | <b>4b·C<sub>6</sub>H<sub>6</sub></b>                            | <b>5a</b>                                         |
|---------------------------------------------------------------------------------------|-----------------------------------------------------------------|---------------------------------------------------|
| CCDC Number                                                                           | 1993516                                                         | 1993514                                           |
| formula                                                                               | C <sub>43</sub> H <sub>35</sub> F <sub>9</sub> N <sub>2</sub> O | C <sub>42</sub> H <sub>34</sub> F <sub>9</sub> NO |
| fw                                                                                    | 776.73                                                          | 739.70                                            |
| <i>T</i> (K)                                                                          | 123(2)                                                          | 123(2)                                            |
| $\lambda$ (Å)                                                                         | 0.71073                                                         | 0.71073                                           |
| cryst syst                                                                            | Triclinic                                                       | Orthorhombic                                      |
| space group                                                                           | <i>P</i> -1                                                     | <i>Pccn</i>                                       |
| <i>a</i> (Å)                                                                          | 9.7571(1)                                                       | 37.632(1)                                         |
| <i>b</i> (Å)                                                                          | 10.1037(1)                                                      | 14.8891(4)                                        |
| <i>c</i> (Å)                                                                          | 19.2300(3)                                                      | 13.0219(4)                                        |
| $\alpha$ (deg)                                                                        | 86.600(1)                                                       | 90                                                |
| $\beta$ (deg)                                                                         | 88.612(1)                                                       | 90                                                |
| $\gamma$ (deg)                                                                        | 81.412(1)                                                       | 90                                                |
| <i>V</i> (Å <sup>3</sup> )                                                            | 1870.97(4)                                                      | 7296.3(4)                                         |
| <i>Z</i>                                                                              | 2                                                               | 8                                                 |
| <i>D</i> <sub>calc</sub> (g/cm <sup>3</sup> )                                         | 1.361                                                           | 1.347                                             |
| $\mu$ (mm <sup>-1</sup> )                                                             | 0.112                                                           | 0.112                                             |
| <i>F</i> (000)                                                                        | 792                                                             | 3056                                              |
| cryst size (mm)                                                                       | 0.10 × 0.10 × 0.10                                              | 0.15 × 0.10 × 0.05                                |
| $\theta$ range (deg)                                                                  | 2.348–29.766                                                    | 2.123–27.888                                      |
| reflns collected                                                                      | 37233                                                           | 27734                                             |
| indep reflns/ <i>R</i> <sub>int</sub>                                                 | 9620/0.0286                                                     | 7329/0.0503                                       |
| params                                                                                | 583                                                             | 510                                               |
| GOF on <i>F</i> <sup>2</sup>                                                          | 1.059                                                           | 1.071                                             |
| <i>R</i> <sub>1</sub> , w <i>R</i> <sub>2</sub> [ <i>I</i> > 2 $\sigma$ ( <i>I</i> )] | 0.0465, 0.1209                                                  | 0.0697, 0.1559                                    |
| <i>R</i> <sub>1</sub> , w <i>R</i> <sub>2</sub> (all data)                            | 0.0610, 0.1286                                                  | 0.1062, 0.1699                                    |

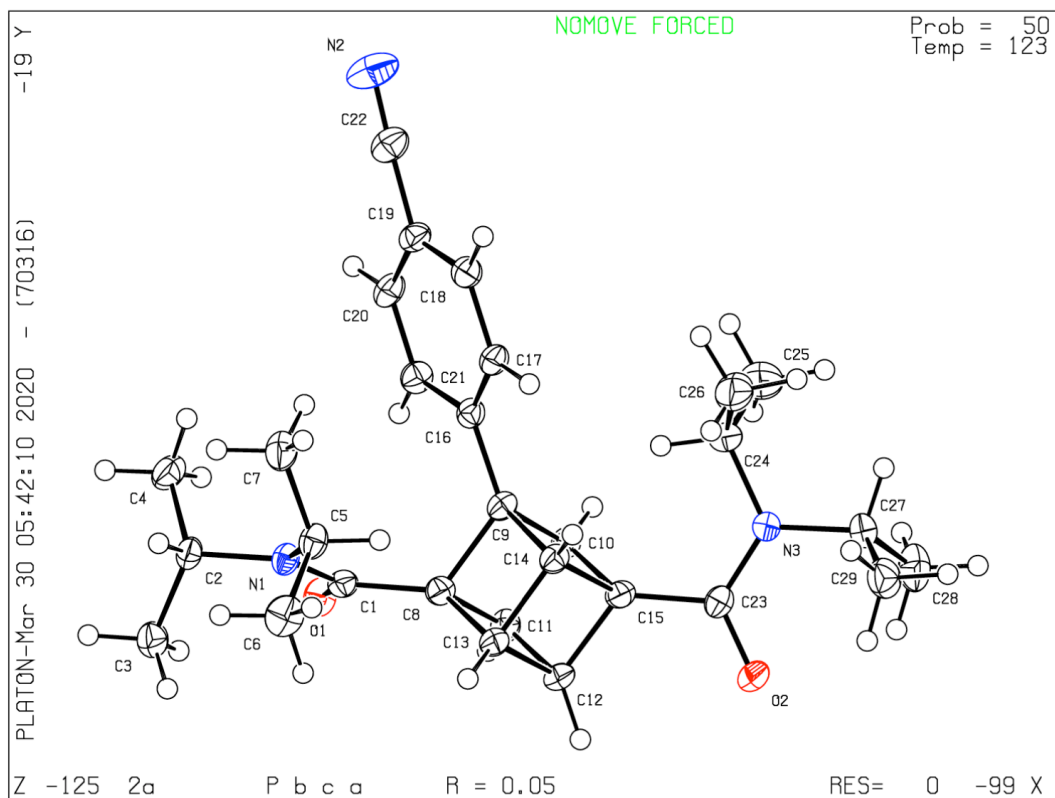

**Figure S1.** X-ray single crystal structure of **2a**.

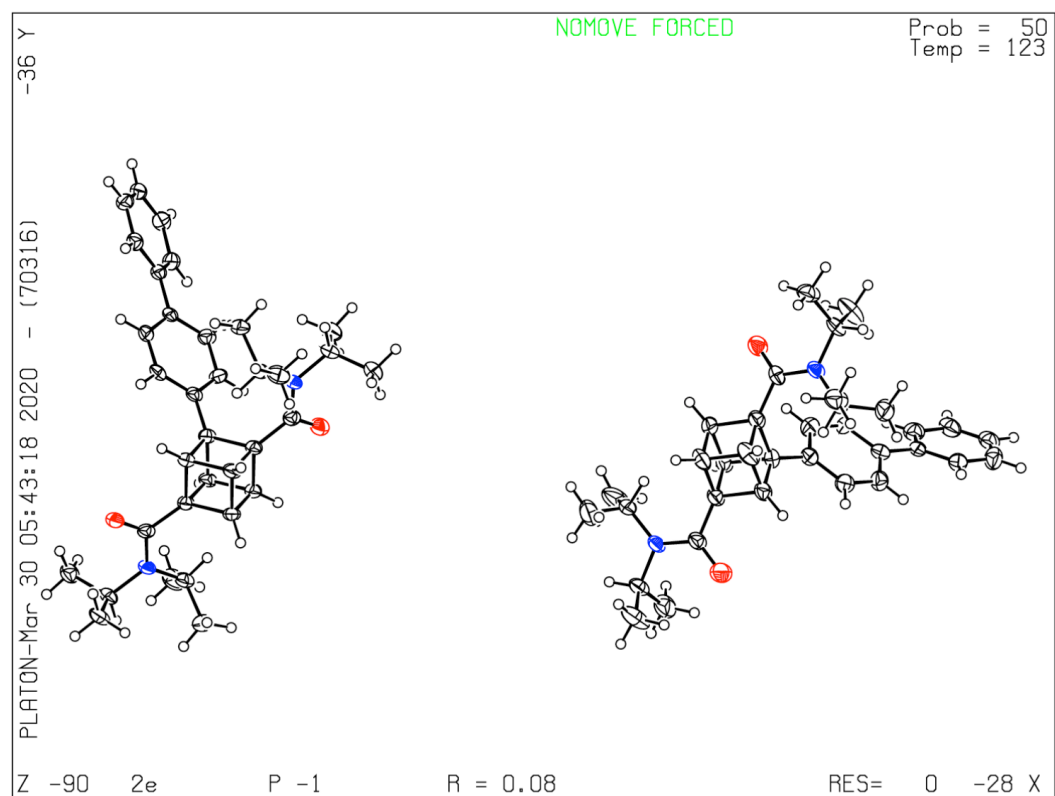

**Figure S2.** X-ray single crystal structure of **2e**.

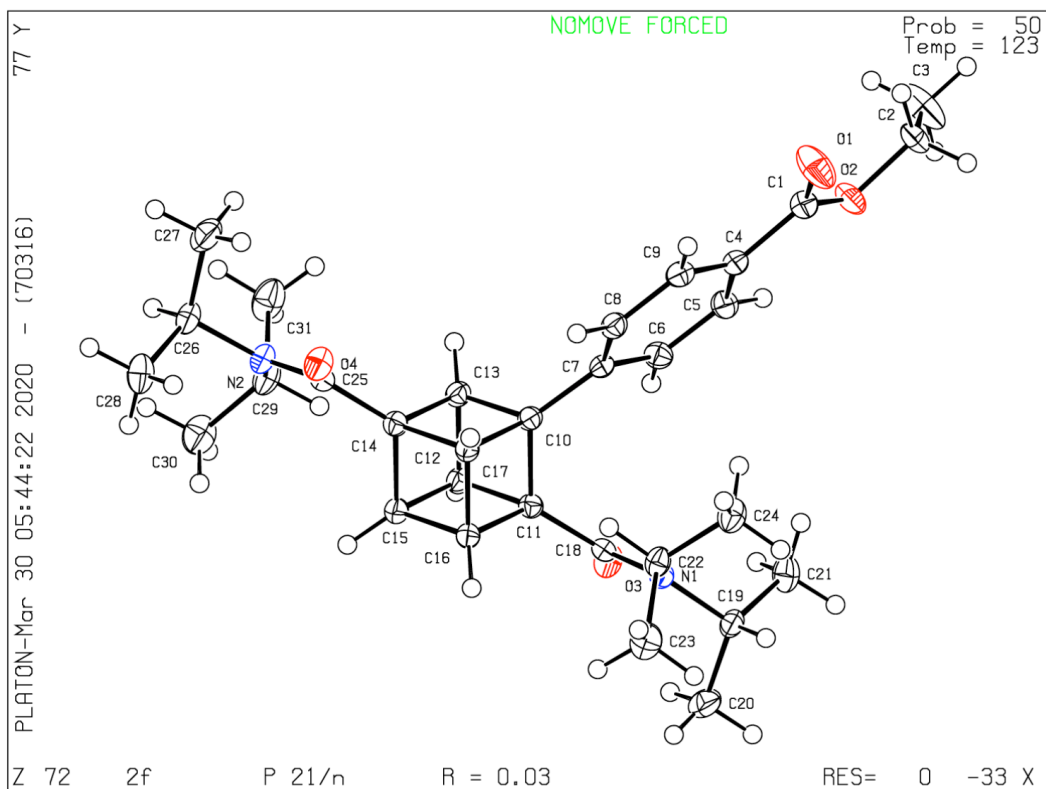

**Figure S3.** X-ray single crystal structure of **2f**.

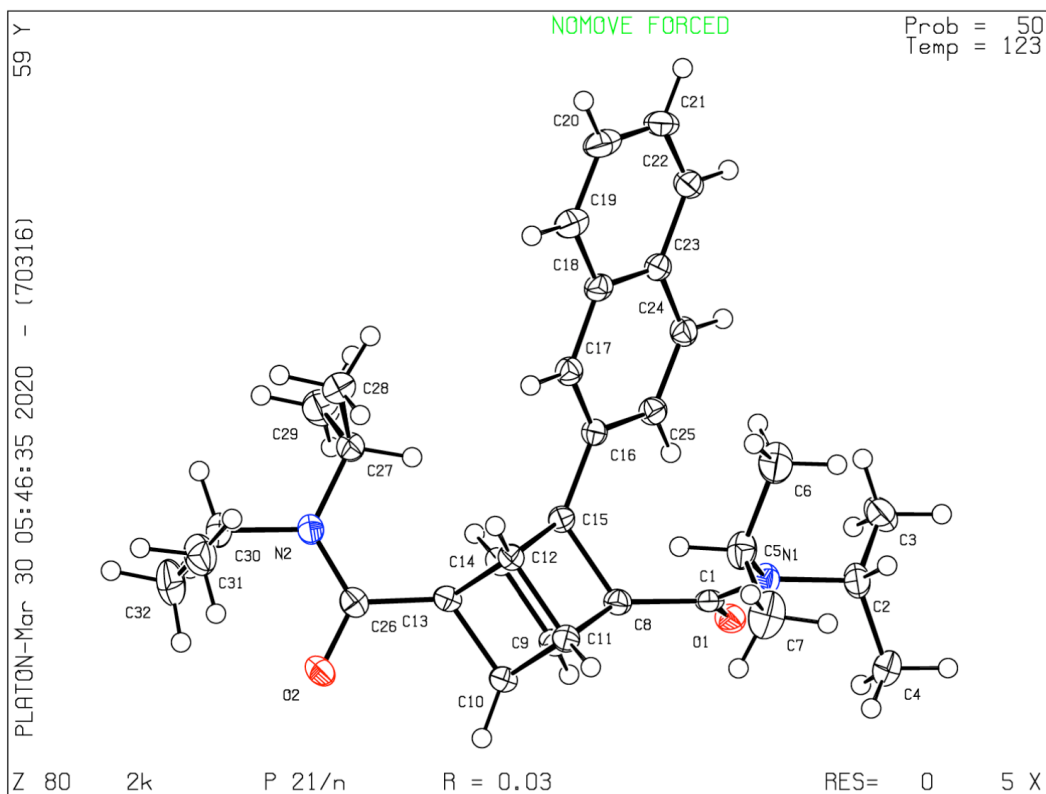

**Figure S4.** X-ray single crystal structure of **2k**.

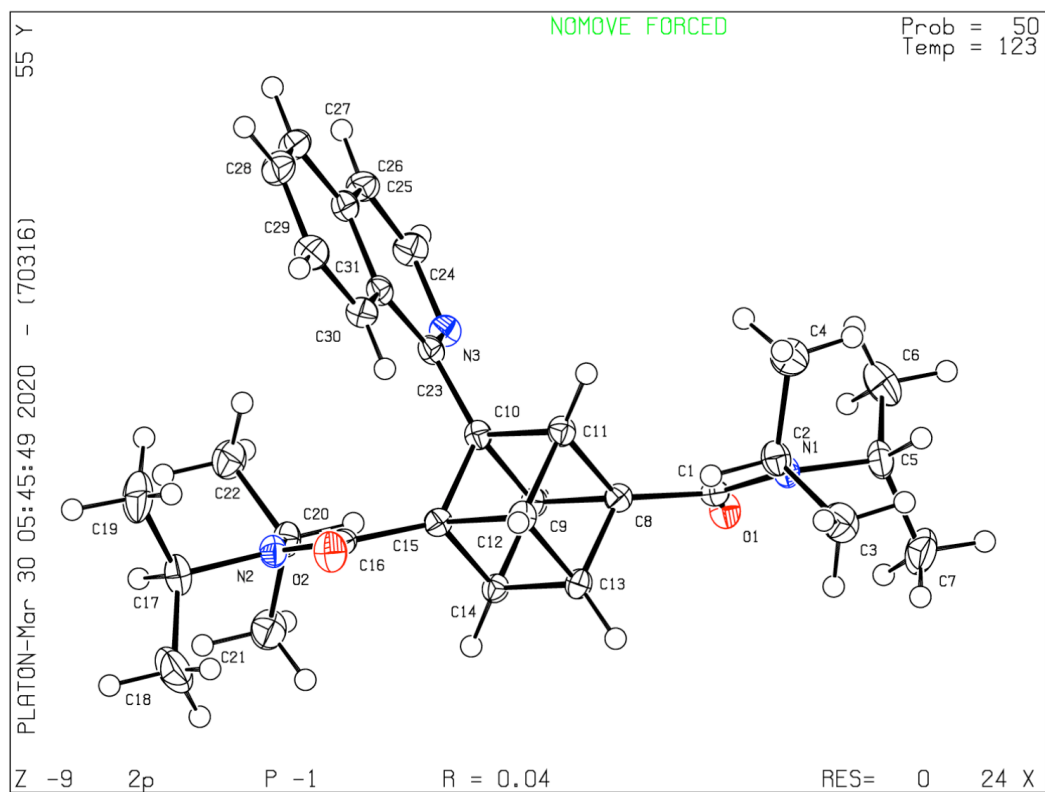

**Figure S5.** X-ray single crystal structure of **2p**.

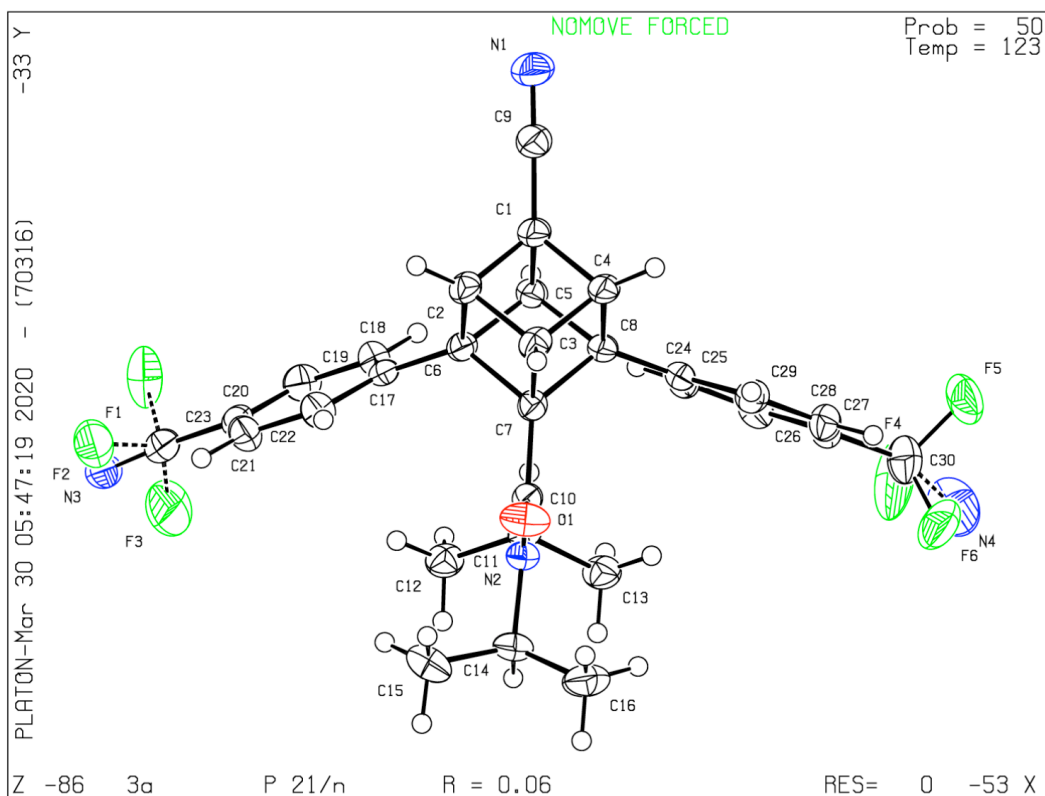

**Figure S6.** X-ray single crystal structure of **3a**.



## 8. HPLC Chart

HPLC analysis was conducted on a Shimadzu Prominence 2000 instrument equipped with a CHIRALPAK® ID-3 column (eluent: n-hexane/*i*PrOH = 90/10, 1.0 mL·s<sup>-1</sup>, 35 °C, Detector: PDA Ch1 254 nm 4 nm).

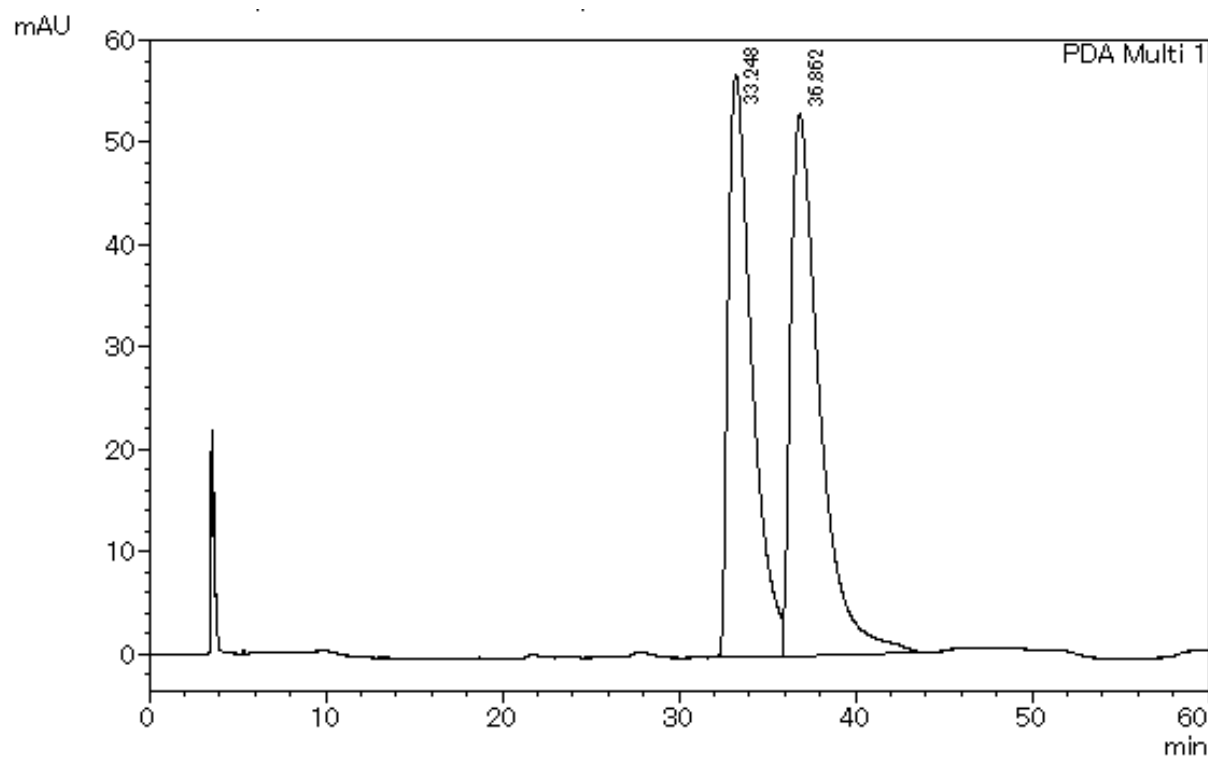

**Figure S9.** Chromatogram of **3a**.

**Table S5.** Peak table of **3a**.

| Peak # | Retention Time [min] | Area [mAU*s] | Height [mAU] | Area % |
|--------|----------------------|--------------|--------------|--------|
| 1      | 33.248               | 5342.042     | 56.959       | 46.994 |
| 2      | 36.862               | 6025.430     | 52.900       | 53.006 |

HPLC analysis was conducted on a Shimadzu Prominence 2000 instrument equipped with equipped with a CHIRALPAK® ID-3 column (eluent: n-hexane/*i*PrOH = 95/5.0, 1.0 mL·s<sup>-1</sup>, 35 °C, Detector: PDA Ch1 254 nm 4 nm).

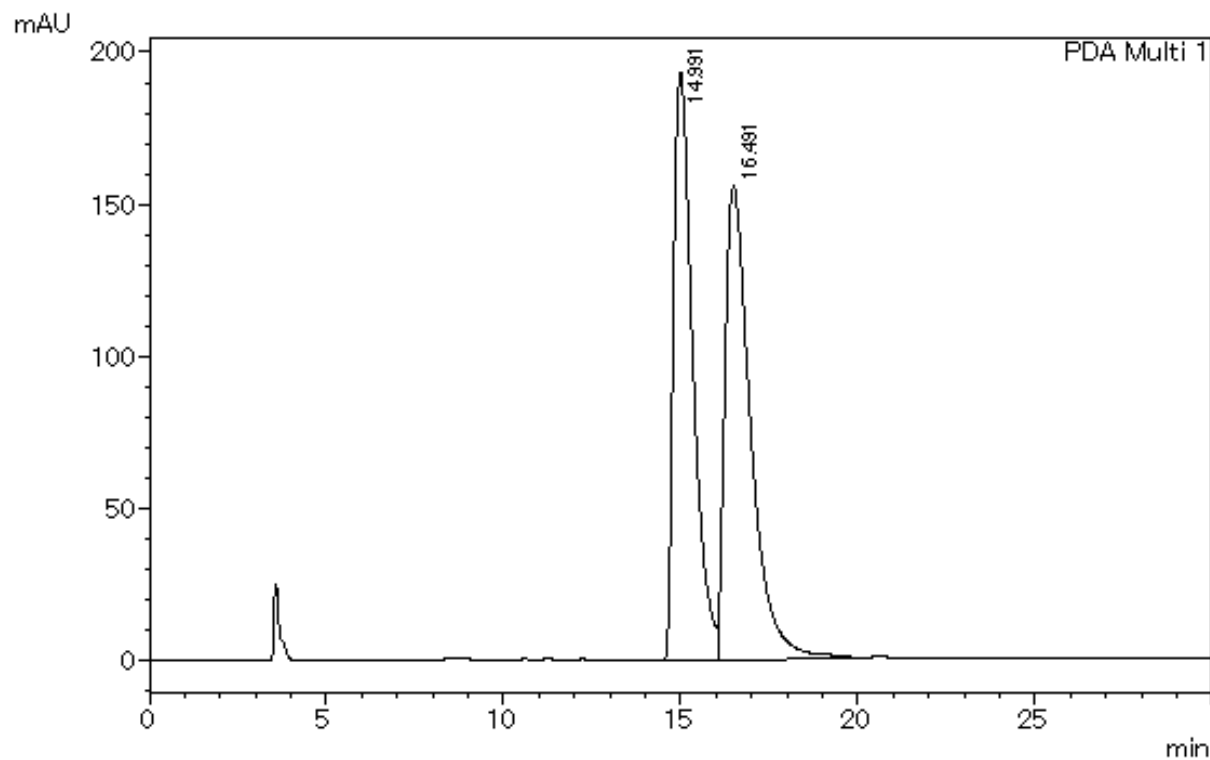

**Figure S10.** Chromatogram of **3f**.

**Table S6.** Peak table of **3f**.

| Peak # | Retention Time [min] | Area [mAU*s] | Height [mAU] | Area % |
|--------|----------------------|--------------|--------------|--------|
| 1      | 14.991               | 7365.028     | 192.240      | 48.416 |
| 2      | 16.491               | 7847.087     | 154.854      | 51.584 |

## 9. Reference

- [1] T. Ukai, H. Kawazura, Y. Ishii, J. J. Bonnet, J. A. Ibers, *J. Organometallic Chem.* **1974**, *65*, 253.
- [2] Y. Sawamura, H. Nakatsuji, A. Sakakura, K. Ishihara, *Chem. Sci.* **2013**, *4*, 4181.
- [3] G. Öztürk, M. Förstel, Y. Ergun, S. Alp, W. Rettig, *J. Fluoresc.* **2008**, *18*, 1007.
- [4] C. Wallinder, M. Botros, U. Rosenström, M.-O. Guimond, H. Beaudry, F. Nyberg, N. Gallo-Payet, A. Hallberg, M. Alterman, *Bioorg. Med. Chem.* **2008**, *16*, 6841.
- [5] M. Jean, J. Renault, P. Uriac, M. Capet, P. van de Weghe, *Org. Lett.* **2007**, *9*, 3623.
- [6] P. E. Eaton, Y. Xiong, J. P. Zhou, *J. Org. Chem.* **1992**, *57*, 4277.
- [7] Y. Kondo, M. Shilai, M. Uchiyama, T. Sakamoto, *J. Am. Chem. Soc.* **1999**, *121*, 3539.
- [8] S. S. R. Bernhard, G. M. Locke, S. Plunkett, A. Meindl, K. J. Flanagan, M. O. Senge, *Chem. -Eur. J.* **2018**, *24*, 1026.
- [9] T. Qin, L. R. Malins, J. T. Edwards, R. R. Merchant, A. J. E. Novak, J. Z. Zhong, R. B. Mills, M. Yan, C. Yuan, M. D. Eastgate, P. S. Baran, *Angew. Chem., Int. Ed.* **2017**, *56*, 260.
- [10] A. Altomare, M. C. Burla, M. Camalli, G. L. Cascarano, C. Giacovazzo, A. Guagliardi, A. G. G. Moliterni, G. Polidori, R. Spagna, SIR97: a New Tool for Crystal Structure Determination and Refinement. *J. Appl. Crystallogr.* **1999**, *32*, 115.
- [11] G. M. Sheldrick, *Acta Crystallogr.*, **2015**, *C71*, 3.
- [12] G. M. Sheldrick, *Acta Crystallogr.*, **2015**, *A71*, 3.
- [13] (a) Yadokari-XG Software for Crystal Structure Analyses. K. Wakita 2001. (b) K. Chizuko, A. Shigehisa, K. Eunsang, Release of Software (Yadokari-XG 2009) for Crystal Structure Analyses. *J. Cryst. Soc. Jpn.* **2009**, *51*, 218.
- [14] O. V. Dolomanov, L. J. Bourhis, R. J. Gildea, J. A. K. Howard, Puschmann, H. *J. Appl. Crystallogr.*, **2009**, *42*, 339.
